# Supplementary material
Source: PubMed Central journal article supplement (PMC5663302)

SUPPORTING INFORMATION

**Insularity effects on the assemblage of the blood parasite community of the birds from the Gulf of Guinea**

Claire Loiseau, Martim Melo, Elisa Lobato, Jon S. Beadell, Robert C. Fleischer,  
Sandra Reis, Claire Doutrelant and Rita Covas

**Appendix S1** Characteristics of sampling sites and host species.

**Table S1.1** Sampling sites and their characteristics: Alt (altitude above sea level in meters), Habitat (P = plantation and F = forest), sampling year(s) and coordinates.  $N_i/N_{sp}$ : number of individuals/species captured per site.

| <i>Location</i> | <i>Region</i> | <i>Site</i>  | $N_i/N_{sp}$ | <i>Alt</i> | <i>Habitat</i> | <i>Year</i>  | <i>Coordinates</i> |
|-----------------|---------------|--------------|--------------|------------|----------------|--------------|--------------------|
| Island          | Annobón       | Rio Anganchi | 4/1          | 100        | P              | 2004         | 0126S 00539E       |
|                 |               | Lago Pot     | 8/3          | 250        | P              | 2004         | 0125S 00538E       |
|                 |               | <i>Total</i> | <i>12/3</i>  |            |                |              |                    |
| São Tomé        | Abade         | 26/7         | 600          | P          | 2013           | 0015N 00639E |                    |
|                 | Alto Douro    | 69/9         | 150          | P          | 2002-03-04-13  | 0012N 00641E |                    |
|                 | Angus         | 2/1          | 5            | P          | 2004           | 0020N 00642E |                    |
|                 | Bom Sucesso   | 21/3         | 1150         | P          | 2002-03-04-05  | 0017N 00636E |                    |
|                 | Contador dam  | 107/13       | 600          | P          | 2005-13-14     | 0019N 00632E |                    |
|                 | Duas grotas   | 4/2          | 332          | P          | 2013           | 0013N 00636E |                    |
|                 | Lagoa Amélia  | 41/8         | 1500         | F          | 2002-03-04-05  | 0016N 00635E |                    |
|                 | Margão        | 4/2          | 447          | P          | 2013           | 0018N 00639E |                    |
|                 | Monte Café    | 8/3          | 720          | P          | 2002           | 0018N 00638E |                    |
|                 | Monte Carmo   | 2/1          | 300          | F          | 2002           | 0008N 00634E |                    |

|          |          |                 |               |      |   |               |              |
|----------|----------|-----------------|---------------|------|---|---------------|--------------|
|          |          | Monteforte      | 50/7          | 150  | P | 2013          | 0020N 00632E |
|          |          | Pico Calvário   | 8/2           | 1590 | F | 2002          | 0016N 00634E |
|          |          | Praia Cruz      | 152/12        | 5    | P | 2013-14       | 0022N 00642E |
|          |          | Quija           | 28/3          | 650  | F | 2002-03-04-05 | 0009N 00633E |
|          |          | S. Miguel       | 9/3           | 400  | F | 2005          | 0010N 00630E |
|          |          | Umbungu         | 13/6          | 300  | F | 2003-04       | 0009N 00633E |
|          |          | Vanguarda       | 5/3           | 582  | P | 2013          | 0018N 00639E |
|          |          | <i>Total</i>    | <i>549/25</i> |      |   |               |              |
|          | Boné     | Boné de Jóquei  | 51/1          | 5    | F | 2002-03-04    | 0130N 00725E |
|          | Príncipe | Água Cató-Henry | 64/5          | 40   | P | 2014          | 0137N 00724E |
|          |          | Água Petróleo   | 8/3           | 120  | P | 2002          | 0140N 00724E |
|          |          | Bela Vista      | 93/10         | 40   | P | 2002-04-14    | 0137N 00724E |
|          |          | Oquê Daniel     | 80/14         | 60   | P | 2014          | 0136N 00724E |
|          |          | Praia Cará      | 38/3          | 30   | P | 2003-04       | 0133N 00721E |
|          |          | Ribeira Porco   | 13/5          | 130  | F | 2002-03       | 0132N 00722E |
|          |          | Sundi           | 25/6          | 170  | P | 2002-03       | 0140N 00723E |
|          |          | <i>Total</i>    | <i>321/20</i> |      |   |               |              |
|          | Bioko    | Moka            | 28/6          | 1015 | P | 2004          | 0320N 00840E |
|          |          | Pico Basilé     | 37/9          | 2400 | F | 2004          | 0335N 00847E |
|          |          | <i>Total</i>    | <i>65/12</i>  |      |   |               |              |
| Mainland | Cameroon | Limbe           | 6/3           | 90   | P | 2003          | 0400N 00912E |
|          |          | Etinde Trail    | 9/2           | 560  | F | 2003          | 0403N 00907E |
|          |          | Buea            | 23/12         | 1100 | P | 2003          | 0407N 00912E |
|          |          | Mann's Spring   | 32/10         | 2280 | F | 2003          | 0408N 00907E |
|          |          | <i>Total</i>    | <i>70/17</i>  |      |   |               |              |
|          | Gabon    | Bakoumba        | 27/6          | 636  | P | 2013          | 0149S 01300E |
|          |          | Cap Esterias    | 42/13         | 0    | P | 2004          | 0037N 00920E |
|          |          | Ipassa-Makokou  | 37/8          | 510  | P | 2005          | 0030N 01248E |
|          |          | Kango           | 25/10         | 30   | P | 2004          | 0009N 01007E |
|          |          | Lekedi          | 197/11        | 605  | P | 2013          | 0149S 01301E |
|          |          | <i>Total</i>    | <i>328/24</i> |      |   |               |              |

**Table S1.2** Year, month and season of sampling.

| <i>Year</i> | <i>Month</i> | <i>Season</i>   | <i>Region</i>       |
|-------------|--------------|-----------------|---------------------|
| 2002        | October      | Rainy           | São Tomé            |
|             | November     | Rainy           | São Tomé            |
|             | December     | Short Dry       | São Tomé / Príncipe |
| 2003        | January      | Short Dry       | São Tomé            |
|             | February     | Short Dry / Dry | São Tomé / Cameroon |
|             | March        | Rainy           | São Tomé            |
|             | April        | Rainy           | Príncipe            |
|             | November     | Rainy           | São Tomé            |
|             | December     | Short Dry       | São Tomé / Príncipe |
| 2004        | January      | Short Dry       | São Tomé / Bioko    |
|             | February     | Short Dry / Dry | Annobón / Gabon     |
|             | March        | Rainy           | São Tomé / Príncipe |
|             | December     | Short Dry       | Príncipe            |
| 2005        | January      | Short Dry / Dry | São Tomé / Gabon    |
|             | February     | Short Dry       | São Tomé            |
| 2013        | January      | Dry             | Gabon               |
|             | February     | Short Dry       | São Tomé            |
| 2014        | January      | Short Dry       | São Tomé / Príncipe |

**Table S1.3** All the families and species captured are listed with their status (E = endemic and NE = non-endemic) and their number of lineages (*Plasm* = *Plasmodium* sp.; *Haem* = *Haemoproteus* sp.; *Leuco* = *Leucocytozoon* sp.; NA means that species have not been tested).

| Family                        | Species                                | N Mainland | N Island | Location                    | Status | N <i>Plasm</i> | N <i>Haem</i> | N <i>Leuco</i> | N Total |
|-------------------------------|----------------------------------------|------------|----------|-----------------------------|--------|----------------|---------------|----------------|---------|
| Alcedinidae                   | <i>Corythornis cristatus nais</i>      | 0          | 20       | Príncipe                    | E      | 0              | 0             | 0              | 0       |
|                               | <i>Corythornis cristatus thomensis</i> | 0          | 7        | São Tomé                    | E      | 0              | 0             | 0              | 0       |
|                               | <i>Halcyon malimbica</i>               | 0          | 20       | Príncipe                    | NE     | 0              | 0             | 0              | 0       |
|                               | <i>Halcyon senegalensis</i>            | 4          | 0        | Gabon                       | NE     | 0              | 0             | 0              | 0       |
|                               | <i>Ispidina picta</i>                  | 10         | 0        | Gabon                       | NE     | 0              | 1             | 1              | 2       |
| Cisticolidae                  | <i>Camaropectera chloronota</i>        | 4          | 0        | Gabon                       | NE     | 1              | 0             | 1              | 2       |
|                               | <i>Cisticola anonymus</i>              | 5          | 0        | Gabon                       | NE     | 1              | 0             | 0              | 1       |
|                               | <i>Prinia molleri</i>                  | 0          | 18       | São Tomé                    | E      | 0              | 1             | 0              | 1       |
|                               | <i>Urolais epichlora</i>               | 0          | 2        | Bioko                       | NE     | 0              | 0             | 0              | 0       |
| Columbidae                    | <i>Aplopelia larvata</i>               | 0          | 37       | São Tomé, Príncipe          | NE     | 0              | 1             | 0              | 1       |
|                               | <i>Columba malherbii</i>               | 0          | 9        | São Tomé                    | E      | 0              | 2             | 0              | 2       |
|                               | <i>Streptopelia senegalensis</i>       | 0          | 1        | Príncipe                    | NE     | NA             | NA            | 0              | 0       |
|                               | <i>Treron calva</i>                    | 0          | 1        | Príncipe                    | NE     | NA             | NA            | 0              | 0       |
|                               | <i>Turtur afer</i>                     | 15         | 0        | Gabon                       | NE     | 1              | 1             | 0              | 2       |
| Estrildidae                   | <i>Cryptospiza reichnovii</i>          | 4          | 0        | Cameroon                    | NE     | 0              | 1             | 0              | 1       |
|                               | <i>Estrilda astrild</i>                | 0          | 99       | São Tomé, Príncipe          | NE     | 0              | 0             | 1              | 1       |
|                               | <i>Estrilda atricapilla</i>            | 2          | 0        | Gabon                       | NE     | 0              | 0             | 0              | 0       |
|                               | <i>Estrilda melpoda</i>                | 14         | 0        | Gabon                       | NE     | 1              | 2             | 0              | 3       |
|                               | <i>Estrilda nonnula</i>                | 0          | 4        | Bioko                       | NE     | 0              | 0             | 0              | 0       |
|                               | <i>Lonchura bicolor</i>                | 2          | 0        | Gabon                       | NE     | 0              | 1             | 1              | 2       |
|                               | <i>Lonchura cucullata</i>              | 0          | 26       | São Tomé, Príncipe, Annobón | NE     | 0              | 1             | 0              | 1       |
|                               | <i>Lonchura cucullata</i>              | 20         | 0        | Gabon                       | NE     | 1              | 2             | 0              | 3       |
|                               | <i>Pyrenestes ostrinus</i>             | 3          | 0        | Gabon                       | NE     | 0              | 0             | 0              | 0       |
|                               | <i>Spermophaga haematina</i>           | 4          | 0        | Gabon                       | NE     | 2              | 0             | 0              | 2       |
| <i>Uraeginthus angolensis</i> | 0                                      | 6          | São Tomé | NE                          | NA     | NA             | 0             | 0              |         |
| Fringillidae                  | <i>Crithagra burtoni</i>               | 3          | 0        | Cameroon                    | NE     | 0              | 0             | 0              | 0       |
|                               | <i>Crithagra capistrata</i>            | 21         | 0        | Gabon                       | NE     | 2              | 0             | 1              | 3       |
|                               | <i>Crithagra concolor</i>              | 0          | 3        | São Tomé                    | E      | 0              | 1             | 1              | 2       |

|               |                                 |    |     |                          |    |    |    |    |    |
|---------------|---------------------------------|----|-----|--------------------------|----|----|----|----|----|
|               | <i>Crithagra mozambica</i>      | 0  | 15  | São Tomé                 | NE | 3  | 0  | 0  | 3  |
|               | <i>Crithagra rufobrunnea</i>    | 0  | 219 | São Tomé, Príncipe, Boné | E  | 5  | 2  | 3  | 10 |
|               | <i>Linurgus olivaceus</i>       | 0  | 4   | Bioko                    | NE | 1  | 0  | 0  | 1  |
|               | <i>Linurgus olivaceus</i>       | 2  | 0   | Cameroon                 | NE | 1  | 0  | 0  | 1  |
| Monarchidae   | <i>Terpsiphone atrochalybea</i> | 0  | 10  | Sao Tome                 | E  | 0  | 0  | 0  | 0  |
|               | <i>Terpsiphone rufiventer</i>   | 2  | 0   | Cameroon                 | NE | 0  | 1  | 0  | 1  |
|               | <i>Terpsiphone smithii</i>      | 0  | 6   | Annobón                  | E  | 0  | 0  | 0  | 0  |
|               | <i>Terpsiphone viridis</i>      | 2  | 0   | Cameroon                 | NE | 0  | 0  | 0  | 0  |
| Nectariniidae | <i>Cinnyris chloropygius</i>    | 6  | 0   | Cameroon, Gabon          | NE | 2  | 0  | 0  | 2  |
|               | <i>Cinnyris reichenowi</i>      | 0  | 4   | Bioko                    | NE | 0  | 0  | 0  | 0  |
|               | <i>Cinnyris reichenowi</i>      | 4  | 0   | Cameroon                 | NE | 0  | 1  | 0  | 1  |
|               | <i>Cyanomitra olivacea</i>      | 0  | 38  | Príncipe                 | NE | 6  | 0  | 0  | 6  |
|               | <i>Cyanomitra olivacea</i>      | 29 | 0   | Cameroon, Gabon          | NE | 8  | 3  | 5  | 16 |
|               | <i>Cyanomitra oritis</i>        | 0  | 6   | Bioko                    | NE | 1  | 0  | 0  | 1  |
|               | <i>Cyanomitra oritis</i>        | 5  | 0   | Cameroon                 | NE | 0  | 0  | 0  | 0  |
|               | <i>Cyanomitra verticalis</i>    | 15 | 0   | Gabon                    | NE | 7  | 0  | 4  | 11 |
|               | <i>Dreptes thomensis</i>        | 0  | 11  | São Tomé                 | E  | 0  | 0  | 2  | 2  |
|               | <i>Nectarinia hartlaubii</i>    | 0  | 18  | Príncipe                 | E  | 5  | 0  | 2  | 7  |
|               | <i>Nectarinia newtonii</i>      | 0  | 36  | São Tomé                 | E  | 6  | 1  | 2  | 9  |
| Ploceidae     | <i>Euplectes albonotatus</i>    | 0  | 8   | São Tomé                 | NE | NA | NA | 0  | 0  |
|               | <i>Euplectes aureus</i>         | 0  | 11  | São Tomé                 | NE | NA | NA | 0  | 0  |
|               | <i>Euplectes hordeaceus</i>     | 0  | 25  | São Tomé                 | NE | 1  | 0  | 0  | 1  |
|               | <i>Euplectes hordeaceus</i>     | 27 | 0   | Gabon                    | NE | 5  | 2  | 6  | 13 |
|               | <i>Ploceus cucullatus</i>       | 0  | 34  | São Tomé                 | NE | 4  | 0  | 0  | 4  |
|               | <i>Ploceus cucullatus</i>       | 51 | 0   | Gabon                    | NE | 4  | 4  | 4  | 12 |
|               | <i>Ploceus grandis</i>          | 0  | 25  | São Tomé                 | E  | 1  | 1  | 2  | 4  |
|               | <i>Ploceus melanogaster</i>     | 0  | 2   | Bioko                    | NE | 1  | 0  | 0  | 1  |
|               | <i>Ploceus melanogaster</i>     | 5  | 0   | Cameroon                 | NE | 1  | 0  | 1  | 2  |
|               | <i>Ploceus nigerrimus</i>       | 6  | 0   | Cameroon, Gabon          | NE | 0  | 2  | 1  | 3  |
|               | <i>Ploceus nigricollis</i>      | 36 | 0   | Gabon                    | NE | 3  | 3  | 12 | 18 |
|               | <i>Ploceus princeps</i>         | 0  | 68  | Príncipe                 | E  | 9  | 0  | 0  | 9  |
|               | <i>Ploceus sanctithomae</i>     | 0  | 23  | São Tomé                 | E  | 3  | 0  | 6  | 9  |

|              |                                       |    |    |                    |    |    |    |   |    |
|--------------|---------------------------------------|----|----|--------------------|----|----|----|---|----|
|              | <i>Ploceus velatus</i>                | 0  | 9  | São Tomé           | NE | NA | NA | 0 | 0  |
|              | <i>Quelea erythrops</i>               | 0  | 2  | São Tomé           | NE | NA | NA | 0 | 0  |
|              | <i>Quelea erythrops</i>               | 7  | 0  | Gabon              | NE | 0  | 3  | 0 | 3  |
| Pycnonotidae | <i>Arizelocichla tephrolaema</i>      | 0  | 8  | Bioko              | NE | 0  | 1  | 1 | 2  |
|              | <i>Arizelocichla tephrolaema</i>      | 5  | 0  | Cameroon           | NE | 0  | 0  | 1 | 1  |
|              | <i>Eurillas latirostris</i>           | 12 | 0  | Gabon              | NE | 2  | 1  | 5 | 8  |
|              | <i>Eurillas virens</i>                | 0  | 6  | Bioko              | NE | 0  | 0  | 0 | 0  |
|              | <i>Eurillas virens</i>                | 14 | 0  | Cameroon, Gabon    | NE | 4  | 0  | 0 | 4  |
|              | <i>Pycnonotus barbatus</i>            | 6  | 0  | Gabon              | NE | 3  | 0  | 0 | 3  |
| Sturnidae    | <i>Lamprotornis splendens/ornatus</i> | 0  | 18 | Príncipe           | E  | 1  | 0  | 0 | 1  |
|              | <i>Onychognathus fulgidus</i>         | 0  | 3  | São Tomé           | E  | NA | NA | 0 | 0  |
| Sylviidae    | <i>Horizorhinus dohrni</i>            | 0  | 6  | Príncipe           | E  | NA | NA | 0 | 0  |
|              | <i>Pseudoalcippe abyssinica</i>       | 0  | 3  | Bioko              | NE | 0  | 0  | 0 | 0  |
|              | <i>Pseudoalcippe abyssinica</i>       | 5  | 0  | Cameroon           | NE | 0  | 2  | 0 | 2  |
| Turdidae     | <i>Turdus olivaceofuscus</i>          | 0  | 47 | São Tomé, Príncipe | E  | 6  | 2  | 4 | 12 |
|              | <i>Turdus pelios</i>                  | 0  | 13 | Bioko              | NE | 2  | 0  | 1 | 3  |
|              | <i>Turdus pelios</i>                  | 39 | 0  | Cameroon, Gabon    | NE | 8  | 2  | 2 | 12 |
| Zosteropidae | <i>Zosterops brunneus</i>             | 0  | 8  | Bioko              | E  | 1  | 2  | 0 | 3  |
|              | <i>Zosterops feae</i>                 | 0  | 6  | São Tomé           | E  | 0  | 1  | 0 | 1  |
|              | <i>Zosterops ficedulinus</i>          | 0  | 4  | Príncipe           | E  | 1  | 1  | 0 | 2  |
|              | <i>Zosterops griseovirescens</i>      | 0  | 5  | Annobón            | E  | 0  | 1  | 1 | 2  |
|              | <i>Zosterops leucophaeus</i>          | 0  | 16 | Príncipe           | E  | 1  | 1  | 0 | 2  |
|              | <i>Zosterops lugubris</i>             | 0  | 24 | São Tomé           | E  | 0  | 3  | 0 | 3  |
|              | <i>Zosterops melanocephalus</i>       | 3  | 0  | Cameroon           | NE | 0  | 0  | 0 | 0  |
|              | <i>Zosterops senegalensis</i>         | 0  | 5  | Bioko              | NE | 1  | 1  | 2 | 4  |
|              | <i>Zosterops senegalensis</i>         | 6  | 0  | Cameroon           | NE | 0  | 1  | 1 | 2  |

**Appendix S2** Host specificity indices, distribution and prevalence of Haemosporidia lineages in the 13 bird families sampled in the Gulf of Guinea, and further statistical results for the paired-species design excluding some pairs (1 and 5).

### Statistical Results

For the paired-species design, we used the package lme4 in R version 3.1.3 (R Core Team, 2015). We tested the insularity effect using generalized linear mixed models on parasite prevalence and diversity with the random effect 'species' nested in 'pair' nested in 'family'.

Because we formed two pairs including species with different genus: pair 1 (genus *Turtur*, *Aplopelia* and *Columba*) and pair 5 (genus *Cyanomitra* and *Nectarinia*), we did the statistical analyses including them (in the main text) or excluding them, presented below. In both cases we found the same results.

#### Insularity effect on prevalence:

##### a) *Haemoproteus*

|                   | Estimate | Std. Error | z value | Pr(> z )     |
|-------------------|----------|------------|---------|--------------|
| (Intercept)       | -6.138   | 1.289      | -4.762  | 1.91e-06 *** |
| Insularity effect | 4.185    | 1.017      | 4.115   | 3.87e-05 *** |

##### b) *Leucocytozoon*

|                   | Estimate | Std. Error | z value | Pr(> z )     |
|-------------------|----------|------------|---------|--------------|
| (Intercept)       | -2.5361  | 0.6018     | -4.214  | 2.51e-05 *** |
| Insularity effect | 3.0648   | 0.5273     | 5.813   | 6.15e-09 *** |

##### c) *Plasmodium*

|                   | Estimate | Std. Error | z value | Pr(> z )   |
|-------------------|----------|------------|---------|------------|
| (Intercept)       | -1.1032  | 0.8082     | -1.365  | 0.17224    |
| Insularity effect | 0.8665   | 0.3060     | 2.832   | 0.00463 ** |

#### Insularity effect on diversity:

##### a) *Haemoproteus*

|                   | Estimate | Std. Error | z value | Pr(> z )   |
|-------------------|----------|------------|---------|------------|
| (Intercept)       | -1.7918  | 0.707      | -2.534  | 0.01128 *  |
| Insularity effect | 2.3026   | 0.752      | 3.059   | 0.00222 ** |

##### b) *Leucocytozoon*

|                   | Estimate | Std. Error | z value | Pr(> z )     |
|-------------------|----------|------------|---------|--------------|
| (Intercept)       | -0.5792  | 0.5174     | -1.119  | 0.263034     |
| Insularity effect | 1.2979   | 0.3678     | 3.529   | 0.000417 *** |

##### c) *Plasmodium*

|                   | Estimate | Std. Error | z value | Pr(> z ) |
|-------------------|----------|------------|---------|----------|
| (Intercept)       | 0.8375   | 0.3462     | 2.419   | 0.0156 * |
| Insularity effect | 0.1340   | 0.2588     | 0.518   | 0.6047   |

**Table S2.1** All described Haemosporidia lineages from the Gulf of Guinea are listed by genus (P = *Plasmodium*, H = *Haemoproteus* and L = *Leucocytozoon*), with their host specificity indices (STD) and their Genbank accession number. The number of orders (O), families (F), genera (G) and species (Sp) in which the lineages have been found is also given. We present the combined data of i) our sampling (**in bold**) and ii) the additional MalAvi/Genbank data (*in italic*). “\*” indicates a new lineage.

| Location        | Lineage          | Genera | O | F  | G  | Sp | STD   | Genbank  |
|-----------------|------------------|--------|---|----|----|----|-------|----------|
| <i>Mainland</i> | <b>ACCTAC01</b>  | P      | 6 | 12 | 17 | 19 | 18.45 | EU810700 |
|                 | <b>AFTRU07</b>   | P      | 1 | 1  | 1  | 1  | 0     | EU810631 |
|                 | <b>AFTRU08</b>   | P      | 1 | 1  | 1  | 1  | 0     | EU810633 |
|                 | <b>AFTRU4</b>    | P      | 1 | 1  | 1  | 2  | 2     | DQ847261 |
|                 | <i>ALEDIA01</i>  | P      | 1 | 1  | 1  | 1  | 0     | DQ659552 |
|                 | <i>ALEDIA02</i>  | P      | 1 | 2  | 2  | 2  | 4.00  | EU810634 |
|                 | <i>ALPOL02</i>   | P      | 1 | 4  | 5  | 6  | 7.00  | EU810636 |
|                 | <i>ANLAT01</i>   | P      | 1 | 2  | 2  | 2  | 4.00  | EU770151 |
|                 | <b>ANLAT03</b>   | P      | 1 | 2  | 3  | 4  | 4.82  | EU810642 |
|                 | <i>ANLAT04</i>   | P      | 1 | 2  | 5  | 7  | 7.19  | EU810623 |
|                 | <i>ANLAT05</i>   | P      | 1 | 1  | 1  | 1  | 0     | DQ508377 |
|                 | <i>ANLAT06</i>   | P      | 1 | 1  | 1  | 2  | 2.00  | DQ508381 |
|                 | <i>ANLAT07</i>   | P      | 1 | 1  | 1  | 2  | 2.00  | FJ404720 |
|                 | <i>ANLAT09</i>   | P      | 1 | 1  | 2  | 2  | 3.00  | FJ404719 |
|                 | <b>ANVIR01</b>   | P      | 1 | 1  | 1  | 1  | 0     | EU810617 |
|                 | <i>BSRI</i>      | P      | 1 | 2  | 2  | 2  | 4     | AF495548 |
|                 | <b>BT8</b>       | P      | 1 | 6  | 9  | 14 | 13.28 | AY393792 |
|                 | <b>BUL04</b>     | P      | 1 | 1  | 1  | 1  | 0     | EU810629 |
|                 | <b>BUL05</b>     | P      | 1 | 1  | 1  | 1  | 0     | EU810630 |
|                 | <i>BUL06</i>     | P      | 1 | 1  | 1  | 1  | 0     | EU810627 |
|                 | <b>BUL07</b>     | P      | 7 | 23 | 31 | 33 | 31.25 | EU810628 |
|                 | <b>CIANO01</b>   | P      | 1 | 1  | 1  | 1  | 0     | EU810654 |
|                 | <b>CINCHL01</b>  | P      | 1 | 2  | 3  | 3  | 4.46  | DQ659577 |
|                 | <i>CINCHL02</i>  | P      | 1 | 2  | 2  | 2  | 4.00  | EU810663 |
|                 | <i>CINPRE02</i>  | P      | 1 | 1  | 1  | 1  | 0     | KJ446984 |
|                 | <i>COSUN2</i>    | P      | 1 | 1  | 1  | 2  | 2.00  | DQ847269 |
|                 | <b>CRICAP01*</b> | P      | 1 | 2  | 2  | 2  | 4.00  | KT376920 |
|                 | <i>CYAOLI01</i>  | P      | 1 | 1  | 1  | 1  | 0     | DQ659579 |
|                 | <b>CYAOLI02</b>  | P      | 1 | 1  | 1  | 1  | 0     | DQ659587 |
|                 | <b>CYAOLI09</b>  | P      | 1 | 2  | 2  | 2  | 4.00  | FJ404707 |
|                 | <i>CYAOLII0</i>  | P      | 1 | 1  | 1  | 1  | 0     | FJ404717 |
|                 | <i>CYAOLII2</i>  | P      | 1 | 1  | 1  | 1  | 0     | FJ424521 |
|                 | <i>CYAORI02</i>  | P      | 1 | 1  | 1  | 1  | 0     | KJ446986 |
|                 | <i>CYAVER01</i>  | P      | 1 | 1  | 1  | 1  | 0     | KJ446985 |
|                 | <b>CYAVER02*</b> | P      | 1 | 1  | 1  | 1  | 0     | KT376922 |
|                 | <i>GBCAMI</i>    | P      | 1 | 3  | 3  | 3  | 5     | DQ847267 |
|                 | <b>GRW02</b>     | P      | 2 | 5  | 11 | 14 | 12.93 | AF254962 |
|                 | <b>GRW09</b>     | P      | 1 | 15 | 47 | 63 | 60.97 | DQ060773 |
|                 | <i>GRW11</i>     | P      | 3 | 14 | 25 | 40 | 35.39 | AY831748 |
|                 | <i>GRW12</i>     | P      | 1 | 1  | 1  | 1  | 0     | DQ368378 |
|                 | <i>LAMPUR03</i>  | P      | 1 | 2  | 2  | 2  | 4.00  | EU810655 |
|                 | <i>NEOBS01</i>   | P      | 1 | 1  | 1  | 3  | 3.00  | FJ404705 |
|                 | <i>NEOBS02</i>   | P      | 1 | 1  | 1  | 1  | 0     | DQ508392 |
|                 | <i>PBPIP1</i>    | P      | 1 | 4  | 4  | 6  | 6.38  | DQ847258 |



|                         |   |    |    |    |     |       |          |
|-------------------------|---|----|----|----|-----|-------|----------|
| <b><u>PHICT01</u></b>   | P | 1  | 2  | 3  | 5   | 5.07  | EU810619 |
| <i>PHICT02</i>          | P | 1  | 1  | 2  | 3   | 3.46  | EU810622 |
| <i>PSB1</i>             | P | 1  | 2  | 2  | 2   | 4.00  | AF495566 |
| <i>REB12P</i>           | P | 1  | 1  | 1  | 2   | 2.00  | DQ847259 |
| <b><u>RFF1</u></b>      | P | 1  | 6  | 12 | 24  | 21.76 | DQ847264 |
| <i>RTSR1</i>            | P | 3  | 7  | 11 | 14  | 13.19 | AF495568 |
| <i>SGS1</i>             | P | 11 | 31 | 67 | 106 | 90.33 | AF495571 |
| <b><u>SYAT05</u></b>    | P | 4  | 13 | 16 | 22  | 19.63 | DQ847271 |
| <i>SYBOR02</i>          | P | 1  | 5  | 7  | 9   | 9.71  | DQ368392 |
| <i>SYBOR05</i>          | P | 1  | 2  | 2  | 2   | 4.00  | DQ368393 |
| <i>SYBOR10</i>          | P | 2  | 4  | 4  | 5   | 6.09  | DQ368390 |
| <i>SYBOR11</i>          | P | 1  | 2  | 3  | 3   | 4.46  | DQ368391 |
| <i>TERUF02</i>          | P | 2  | 3  | 3  | 3   | 5.46  | EU810618 |
| <b><u>TURAF01</u></b>   | P | 1  | 1  | 1  | 1   | 0     | EU810698 |
| <i>TURDUS1</i>          | P | 3  | 12 | 24 | 31  | 28.95 | AF495576 |
| <b><u>TURPEL03*</u></b> | P | 1  | 1  | 1  | 1   | 0     | KT376932 |
| <b><u>TURPEL04*</u></b> | P | 1  | 1  | 1  | 1   | 0     | KT376933 |
| <i>AFTRU1</i>           | L | 1  | 1  | 1  | 1   | 0     | DQ847205 |
| <i>AFTRU2</i>           | L | 1  | 1  | 1  | 1   | 0     | DQ847206 |
| <i>AFTRU3</i>           | L | 1  | 1  | 1  | 1   | 0     | DQ847207 |
| <b><u>ANLAT10</u></b>   | L | 2  | 3  | 4  | 4   | 5.68  | FJ839445 |
| <b><u>ANLAT12</u></b>   | L | 1  | 1  | 1  | 1   | 0     | FJ839447 |
| <b><u>ANLAT17*</u></b>  | L | 1  | 1  | 1  | 1   | 0     | KT376935 |
| <b><u>ANLAT18*</u></b>  | L | 1  | 1  | 1  | 1   | 0     | KT376936 |
| <b><u>ARITEP02*</u></b> | L | 1  | 1  | 1  | 1   | 0     | KT595662 |
| <i>BT2</i>              | L | 1  | 6  | 10 | 12  | 12.66 | AY393802 |
| <i>BUL3</i>             | L | 1  | 1  | 1  | 1   | 0     | DQ847208 |
| <b><u>CAMCHL01*</u></b> | L | 1  | 1  | 1  | 1   | 0     | KT595663 |
| <i>COSUN1</i>           | L | 1  | 1  | 1  | 1   | 0     | DQ847216 |
| <b><u>CYAOLI15*</u></b> | L | 1  | 1  | 1  | 1   | 0     | KT376941 |
| <b><u>CYAOLI16*</u></b> | L | 1  | 1  | 1  | 1   | 0     | KT376942 |
| <b><u>CYAOLI17*</u></b> | L | 1  | 1  | 1  | 1   | 0     | KT376943 |
| <b><u>CYAOLI18*</u></b> | L | 1  | 1  | 1  | 1   | 0     | KT376944 |
| <b><u>CYAVER03*</u></b> | L | 1  | 1  | 1  | 1   | 0     | KT376946 |
| <b><u>CYAVER04*</u></b> | L | 1  | 1  | 1  | 1   | 0     | KT376945 |
| <b><u>EUPHOR02*</u></b> | L | 1  | 1  | 1  | 1   | 0     | KT376947 |
| <b><u>EUPHOR03*</u></b> | L | 1  | 1  | 1  | 1   | 0     | KT376948 |
| <b><u>EUPHOR04*</u></b> | L | 1  | 1  | 1  | 1   | 0     | KT376949 |
| <b><u>HIRUS11</u></b>   | L | 1  | 3  | 3  | 4   | 5.01  | KP696494 |
| <b><u>HYLPRA01*</u></b> | L | 1  | 1  | 1  | 1   | 0     | KT595664 |
| <i>NEOLI02</i>          | L | 1  | 1  | 1  | 1   | 0     | AF465560 |
| <b><u>PLACYA02*</u></b> | L | 1  | 1  | 1  | 1   | 0     | KT595666 |
| <b><u>PLOCUC01*</u></b> | L | 1  | 1  | 1  | 3   | 3.00  | KT376950 |
| <b><u>PLOCUC03*</u></b> | L | 1  | 1  | 1  | 1   | 0     | KT376951 |
| <b><u>PLOCUC04*</u></b> | L | 1  | 1  | 1  | 1   | 0     | KT376952 |
| <b><u>PLOMEL04*</u></b> | L | 1  | 1  | 1  | 1   | 0     | KT595667 |
| <b><u>PLONIG04*</u></b> | L | 1  | 1  | 1  | 1   | 0     | KT376953 |
| <b><u>PLONIG05*</u></b> | L | 1  | 1  | 1  | 1   | 0     | KT376954 |
| <b><u>PLONIG06*</u></b> | L | 1  | 1  | 1  | 2   | 2.00  | KT376955 |
| <b><u>PLONIG10*</u></b> | L | 1  | 1  | 1  | 1   | 0     | KT376956 |
| <b><u>PLONIG11*</u></b> | L | 1  | 1  | 1  | 1   | 0     | KT376957 |
| <b><u>PLONIG12*</u></b> | L | 1  | 1  | 1  | 1   | 0     | KT376958 |
| <b><u>PLONIG13*</u></b> | L | 1  | 1  | 1  | 1   | 0     | KT376959 |
| <b><u>PLONIG14*</u></b> | L | 1  | 1  | 1  | 1   | 0     | KT376960 |
| <b><u>PLONIG15*</u></b> | L | 1  | 1  | 1  | 1   | 0     | KT376961 |

|                         |   |   |   |    |    |       |          |
|-------------------------|---|---|---|----|----|-------|----------|
| <i>REB10</i>            | L | 1 | 2 | 3  | 3  | 4.46  | DQ847222 |
| <i>REB11</i>            | L | 1 | 6 | 7  | 10 | 10.72 | DQ847223 |
| <i>REB12L</i>           | L | 1 | 1 | 1  | 1  | 0     | DQ847227 |
| <i>REB6</i>             | L | 1 | 2 | 3  | 5  | 5.32  | DQ847209 |
| <b><u>REB7</u></b>      | L | 1 | 3 | 4  | 4  | 5.64  | DQ847218 |
| <i>REB8</i>             | L | 1 | 2 | 3  | 4  | 4.68  | DQ847219 |
| <i>REB9</i>             | L | 1 | 1 | 1  | 1  | 0     | DQ847224 |
| <b><u>RECOB3</u></b>    | L | 1 | 9 | 14 | 17 | 17.59 | DQ847221 |
| <b><u>SATEC01</u></b>   | L | 1 | 4 | 4  | 4  | 6.00  | JN032654 |
| <i>SFC8</i>             | L | 1 | 6 | 10 | 16 | 15.12 | DQ847234 |
| <i>SYBOR06</i>          | L | 1 | 2 | 2  | 2  | 4     | DQ847237 |
| <i>SYBOR07</i>          | L | 1 | 1 | 1  | 1  | 0     | DQ847238 |
| <i>SYBOR08</i>          | L | 2 | 3 | 3  | 3  | 5.46  | DQ847239 |
| <i>SYBOR12</i>          | L | 1 | 1 | 1  | 1  | 0     | DQ847211 |
| <i>SYBOR22</i>          | L | 1 | 1 | 1  | 1  | 0     | KJ850284 |
| <b><u>TURPEL02*</u></b> | L | 1 | 1 | 1  | 1  | 0     | KT376972 |
| <i>VIMWE2</i>           | L | 1 | 1 | 1  | 1  | 0     | DQ847225 |
| <i>WW6</i>              | L | 1 | 5 | 7  | 8  | 8.95  | DQ847210 |
| <i>YMWD1</i>            | L | 1 | 2 | 2  | 2  | 4.00  | DQ847220 |
| <i>YMWD2</i>            | L | 1 | 1 | 2  | 2  | 3     | DQ847226 |
| <b><u>ZOSSEN04*</u></b> | L | 1 | 1 | 1  | 1  | 0     | KT376976 |
| <b><u>AFTRU06</u></b>   | H | 1 | 1 | 1  | 1  | 0     | EU810734 |
| <i>ALCLEU01</i>         | H | 1 | 1 | 1  | 1  | 0     | DQ659592 |
| <i>ALCLEU02</i>         | H | 2 | 2 | 3  | 3  | 4.72  | EU810713 |
| <i>ALCLEU03</i>         | H | 1 | 1 | 1  | 1  | 0     | EU810712 |
| <i>ALCQUA01</i>         | H | 1 | 1 | 1  | 1  | 0     | EU810717 |
| <i>ANLAT02</i>          | H | 1 | 1 | 2  | 2  | 3.00  | EU770153 |
| <i>ANSEI01</i>          | H | 1 | 1 | 1  | 1  | 0     | EU810742 |
| <i>BESUN1</i>           | H | 1 | 1 | 1  | 1  | 0     | DQ847183 |
| <i>BLESY01</i>          | H | 1 | 1 | 1  | 1  | 0     | EU810727 |
| <i>BLNW1</i>            | H | 1 | 1 | 1  | 1  | 0     | DQ847202 |
| <i>BUL1</i>             | H | 1 | 1 | 1  | 3  | 3     | DQ847194 |
| <i>BUL2</i>             | H | 1 | 2 | 3  | 5  | 5.07  | DQ847195 |
| <i>CCF6</i>             | H | 1 | 1 | 1  | 1  | 0     | DQ368341 |
| <i>CELEC01</i>          | H | 2 | 3 | 3  | 3  | 5.46  | EU810722 |
| <i>CHAFUL01</i>         | H | 1 | 1 | 1  | 1  | 0     | EU810738 |
| <b><u>CINPRE01</u></b>  | H | 1 | 1 | 1  | 1  | 0     | EU810743 |
| <i>COLL2</i>            | H | 1 | 4 | 9  | 11 | 11.53 | DQ060766 |
| <b><u>CRYRE01</u></b>   | H | 1 | 1 | 1  | 1  | 0     | EU810737 |
| <b><u>CYAOLI03</u></b>  | H | 1 | 1 | 1  | 1  | 0     | EU810741 |
| <b><u>CYAOLI05</u></b>  | H | 1 | 1 | 1  | 1  | 0     | FJ404696 |
| <b><u>CYAOLI06</u></b>  | H | 1 | 1 | 1  | 1  | 0     | FJ404698 |
| <i>CYAOLI07</i>         | H | 1 | 1 | 1  | 1  | 0     | FJ404699 |
| <i>CYAOLI08</i>         | H | 1 | 1 | 1  | 1  | 0     | FJ404700 |
| <i>DELFRA01</i>         | H | 1 | 1 | 1  | 1  | 0     | EU810741 |
| <i>DELFRA02</i>         | H | 1 | 1 | 1  | 1  | 0     | EU810744 |
| <b><u>ESTMEL02*</u></b> | H | 1 | 1 | 1  | 1  | 0     | KT376902 |
| <b><u>EUPHOR01*</u></b> | H | 1 | 1 | 1  | 1  | 0     | KT376904 |
| <i>GLSJO01</i>          | H | 2 | 2 | 2  | 2  | 5.0   | EU810726 |
| <i>HAECOL1</i>          | H | 1 | 1 | 1  | 1  | 0     | AF495554 |
| <i>HALMAL01</i>         | H | 1 | 1 | 1  | 1  | 0     | EU810721 |
| <i>HIPOL1</i>           | H | 1 | 2 | 3  | 4  | 4.68  | DQ000324 |
| <b><u>ILABY01</u></b>   | H | 1 | 2 | 2  | 2  | 4.00  | EU810746 |
| <b><u>ILABY02</u></b>   | H | 1 | 1 | 1  | 1  | 0     | EU810747 |
| <i>LAMPUR01</i>         | H | 1 | 1 | 2  | 3  | 3.46  | EU810728 |

|                         |   |   |   |    |    |       |          |
|-------------------------|---|---|---|----|----|-------|----------|
| <i>LAMPUR02</i>         | H | 1 | 2 | 2  | 2  | 4.00  | EU810729 |
| <i>LAVAI</i>            | H | 1 | 2 | 2  | 3  | 3.72  | DQ847186 |
| <b><u>LONBIC01*</u></b> | H | 1 | 2 | 2  | 2  | 4.00  | KT376905 |
| <b><u>LONCUC02*</u></b> | H | 1 | 1 | 1  | 1  | 0     | KT376907 |
| <i>MALNI01</i>          | H | 1 | 1 | 1  | 1  | 0     | EU810731 |
| <i>NIGBI01</i>          | H | 1 | 1 | 1  | 1  | 0     | EU810736 |
| <b><u>PLOCUC05*</u></b> | H | 1 | 1 | 1  | 1  | 0     | KT376908 |
| <i>PLONIG01</i>         | H | 1 | 1 | 1  | 1  | 0     | HQ386237 |
| <i>PLONIG02</i>         | H | 1 | 1 | 1  | 1  | 0     | HQ386238 |
| <i>PLONIG03</i>         | H | 1 | 1 | 1  | 1  | 0     | HQ386239 |
| <b><u>PLONIG07*</u></b> | H | 1 | 2 | 2  | 2  | 4.00  | KT376910 |
| <b><u>PLONIG08*</u></b> | H | 1 | 1 | 1  | 1  | 0     | KT376911 |
| <b><u>PLONIG09*</u></b> | H | 1 | 1 | 1  | 1  | 0     | KT376912 |
| <b><u>QUERY01</u></b>   | H | 4 | 8 | 9  | 10 | 11.12 | EU810750 |
| <i>RBQ01</i>            | H | 1 | 1 | 2  | 2  | 3.00  | AF495567 |
| <b><u>RBQ07</u></b>     | H | 1 | 1 | 1  | 2  | 2.00  | EF117230 |
| <b><u>RBQ11</u></b>     | H | 1 | 1 | 3  | 4  | 4.64  | EF117229 |
| <i>REB1</i>             | H | 1 | 1 | 1  | 1  | 0     | DQ847180 |
| <b><u>REB2</u></b>      | H | 1 | 1 | 1  | 2  | 2.00  | DQ847191 |
| <i>REB3</i>             | H | 1 | 1 | 1  | 1  | 0     | DQ847196 |
| <i>REB4</i>             | H | 1 | 1 | 3  | 4  | 4.64  | DQ847197 |
| <i>REB5</i>             | H | 1 | 1 | 1  | 1  | 0     | DQ847198 |
| <i>RECOB1</i>           | H | 1 | 1 | 1  | 1  | 0     | DQ847188 |
| <i>RECOB2</i>           | H | 1 | 1 | 1  | 1  | 0     | DQ847187 |
| <b><u>TERUF01</u></b>   | H | 1 | 2 | 2  | 3  | 3.72  | EU810753 |
| <b><u>TURAFE02*</u></b> | H | 1 | 1 | 1  | 1  | 0     | KT376914 |
| <i>VASUNI</i>           | H | 1 | 1 | 1  | 1  | 0     | DQ847184 |
| <b><u>VILWE04</u></b>   | H | 1 | 1 | 1  | 3  | 3.00  | EU810751 |
| <i>VILWE1</i>           | H | 1 | 1 | 1  | 2  | 2.00  | DQ847181 |
| <i>VILWE2</i>           | H | 1 | 1 | 1  | 1  | 0     | DQ847200 |
| <b><u>VILWE3</u></b>    | H | 1 | 1 | 1  | 3  | 3.00  | DQ847201 |
| <i>WW1</i>              | H | 3 | 7 | 10 | 10 | 10.84 | AF254971 |
| <i>YEWE1</i>            | H | 1 | 1 | 1  | 5  | 5     | DQ847192 |
| <i>Island</i>           |   |   |   |    |    |       |          |
| <b><u>ANAHAR03*</u></b> | P | 1 | 1 | 1  | 1  | 0     | KT376918 |
| <b><u>ANANEW01*</u></b> | P | 1 | 1 | 1  | 1  | 0     | KT376919 |
| <b><u>CRIMOZ01*</u></b> | P | 1 | 1 | 1  | 1  | 0     | KT376921 |
| <b><u>PLOCUC02*</u></b> | P | 1 | 1 | 2  | 3  | 3.46  | KT376923 |
| <b><u>PLOPRI02*</u></b> | P | 1 | 1 | 1  | 1  | 0     | KT376924 |
| <b><u>TUROLI01*</u></b> | P | 1 | 1 | 1  | 1  | 0     | KT376926 |
| <b><u>TUROLI02*</u></b> | P | 1 | 1 | 1  | 1  | 0     | KT376927 |
| <b><u>TUROLI03*</u></b> | P | 1 | 1 | 1  | 1  | 0     | KT376928 |
| <b><u>TUROLI04*</u></b> | P | 1 | 1 | 1  | 1  | 0     | KT376929 |
| <b><u>TUROLI11*</u></b> | P | 1 | 1 | 1  | 1  | 0     | KT376930 |
| <b><u>TUROLI12*</u></b> | P | 1 | 1 | 1  | 1  | 0     | KT376931 |
| <b><u>ZOSBRU01*</u></b> | P | 1 | 1 | 1  | 1  | 0     | KT376934 |
| <b><u>ANAHAR01*</u></b> | L | 1 | 1 | 1  | 1  | 0     | KT376937 |
| <b><u>ANAHAR02*</u></b> | L | 1 | 1 | 1  | 1  | 0     | KT376938 |
| <b><u>PLOSAN01*</u></b> | L | 1 | 1 | 1  | 1  | 0     | KT376962 |
| <b><u>PLOSAN04*</u></b> | L | 1 | 1 | 1  | 2  | 2.00  | KT376965 |
| <b><u>TUROLI06*</u></b> | L | 1 | 2 | 2  | 2  | 4.00  | KT376966 |
| <b><u>TUROLI08*</u></b> | L | 1 | 1 | 1  | 1  | 0     | KT376968 |
| <b><u>TUROLI09*</u></b> | L | 1 | 1 | 1  | 1  | 0     | KT376969 |
| <b><u>TUROLI10*</u></b> | L | 1 | 1 | 1  | 1  | 0     | KT376970 |
| <b><u>ZOBOR04</u></b>   | L | 1 | 1 | 1  | 4  | 4.00  | JN032615 |
| <b><u>ARITEP01*</u></b> | H | 1 | 1 | 1  | 1  | 0     | KT376897 |

|             |                  |   |    |    |    |    |       |          |
|-------------|------------------|---|----|----|----|----|-------|----------|
|             | <u>COLMAL01*</u> | H | 1  | 1  | 1  | 1  | 0     | KT376898 |
|             | <u>COLMAL02*</u> | H | 1  | 1  | 1  | 1  | 0     | KT376899 |
|             | <u>CRIRUF05*</u> | H | 1  | 1  | 1  | 1  | 0     | KT376901 |
|             | <u>PLOGRA01*</u> | H | 1  | 1  | 1  | 1  | 0     | KT376909 |
|             | <u>PRIMOL01*</u> | H | 1  | 1  | 1  | 1  | 0     | KT376913 |
|             | <u>TUROLI05*</u> | H | 1  | 1  | 1  | 1  | 0     | KT376915 |
|             | <u>ZOSGRI01*</u> | H | 1  | 1  | 1  | 1  | 0     | KT376916 |
|             | <u>ZOSLUG01*</u> | H | 1  | 1  | 1  | 2  | 2.00  | KT376917 |
|             | <u>ZOSLUG02*</u> | H | 1  | 1  | 1  | 1  | 0     | KT595668 |
|             | <u>ZOSLUG03*</u> | H | 1  | 1  | 1  | 1  | 0     | KT595669 |
|             | <u>ZOSMAD01</u>  | H | 1  | 3  | 3  | 8  | 6.60  | JN661945 |
| <i>Both</i> | <u>AEMO01</u>    | P | 2  | 9  | 13 | 16 | 15.69 | FJ355919 |
|             | <u>AFTRU09</u>   | P | 1  | 1  | 1  | 1  | 0     | EU810611 |
|             | <u>AFTRU5</u>    | P | 3  | 4  | 5  | 6  | 6.73  | DQ847263 |
|             | <u>COLL7</u>     | P | 1  | 6  | 11 | 17 | 16.03 | DQ368376 |
|             | <u>CYAOLI04</u>  | P | 1  | 2  | 7  | 12 | 11.84 | EU810652 |
|             | <u>CYAORI01</u>  | P | 1  | 2  | 2  | 2  | 4.00  | DQ659568 |
|             | <u>GRW04</u>     | P | 3  | 19 | 39 | 61 | 56.66 | AF254975 |
|             | <u>GRW06</u>     | P | 10 | 27 | 40 | 47 | 42.34 | DQ368381 |
|             | <u>LINOLI01</u>  | P | 2  | 9  | 16 | 20 | 19.33 | DQ659554 |
|             | <u>MALNI02</u>   | P | 2  | 7  | 10 | 17 | 14.06 | EU810645 |
|             | <u>PLACAS02</u>  | P | 2  | 5  | 6  | 6  | 6.51  | EU810612 |
|             | <u>PLOPRI01</u>  | P | 1  | 4  | 10 | 11 | 11.35 | DQ659575 |
|             | <u>PLOSAN05*</u> | P | 1  | 1  | 1  | 2  | 2.00  | KT376925 |
|             | <u>PYSUN1</u>    | P | 1  | 3  | 7  | 13 | 12.45 | DQ847268 |
|             | <u>RECOB4</u>    | P | 1  | 3  | 11 | 16 | 15.21 | DQ847260 |
|             | <u>SYBOR09</u>   | P | 1  | 5  | 5  | 5  | 7.00  | DQ368394 |
|             | <u>WW3</u>       | P | 1  | 11 | 16 | 22 | 22.15 | AF495577 |
|             | <u>AFR211</u>    | L | 1  | 9  | 10 | 13 | 13.77 | KM056529 |
|             | <u>AFR212</u>    | L | 1  | 5  | 5  | 5  | 7.00  | KM056530 |
|             | <u>AFR214</u>    | L | 1  | 4  | 7  | 8  | 8.87  | KM056531 |
|             | <u>CRIRUF02*</u> | L | 1  | 4  | 5  | 6  | 7.16  | KT376939 |
|             | <u>CRIRUF04*</u> | L | 1  | 2  | 2  | 2  | 4.00  | KT376940 |
|             | <u>TURPEL01*</u> | L | 1  | 1  | 1  | 1  | 0     | KT376971 |
|             | <u>CRIRUF01*</u> | H | 2  | 4  | 5  | 5  | 6.09  | KT376900 |
|             | <u>ESTMEL03*</u> | H | 2  | 2  | 3  | 3  | 4.72  | KT376903 |
|             | <u>LONCUC01*</u> | H | 1  | 1  | 1  | 1  | 0     | KT376906 |
|             | <u>YEWE2</u>     | H | 1  | 2  | 2  | 4  | 4.00  | DQ847193 |
|             | <u>ZOSSTE01</u>  | H | 1  | 1  | 1  | 6  | 6.00  | EU810756 |

**Table S2.2** Distribution of Haemosporidia lineages in the 13 bird families sampled in the Gulf of Guinea is indicated with grey cells with the numbers of species infected by the lineages. The lineages are classified by their presence on the mainland (Main), on the islands (Isl) or in both the islands and the mainland (Both). (a) *Plasmodium* sp., (b) *Haemoproteus* sp., (c) *Leucocytozoon* sp.

(a) *Plasmodium* sp.

|          | Site | Nectariniidae | Ploceidae | Turdidae | Sylviidae | Fringillidae | Pycnonotidae | Zosteropidae | Estrildidae | Cisticolidae | Sturnidae | Columbidae | Monarchidae | Alcedinidae | Total |
|----------|------|---------------|-----------|----------|-----------|--------------|--------------|--------------|-------------|--------------|-----------|------------|-------------|-------------|-------|
| GRW09    | Main | 9             | 4         | 9        | 3         | 2            | 14           |              | 6           | 1            |           |            |             |             | 48    |
| RFF1     | Main |               | 7         | 1        |           |              | 1            |              | 5           | 7            |           |            |             |             | 21    |
| BUL07    | Main |               | 1         | 1        | 2         | 1            | 4            | 1            | 4           |              | 1         |            |             |             | 15    |
| SYAT05   | Main |               |           | 7        | 4         | 1            |              |              |             |              | 1         | 1          |             |             | 14    |
| GRW02    | Main |               | 2         |          | 7         | 2            |              |              |             |              |           |            |             |             | 11    |
| BT8      | Main |               | 5         | 1        |           | 1            |              |              | 2           |              |           |            | 1           |             | 10    |
| ACCTAC01 | Main |               | 2         | 4        |           |              | 2            |              |             |              | 1         |            |             |             | 9     |
| PHICT01  | Main | 1             |           |          |           |              | 4            |              |             |              |           |            |             |             | 5     |
| CINCHL01 | Main | 4             |           |          |           |              |              |              |             |              |           |            |             |             | 4     |
| ANLAT03  | Main |               |           |          |           |              | 2            |              |             | 1            |           |            |             |             | 3     |
| CYAOLI09 | Main | 1             |           |          |           |              |              |              | 1           |              |           |            |             |             | 2     |
| CRICAP01 | Main | 1             |           |          |           | 1            |              |              |             |              |           |            |             |             | 2     |
| AFTRU4   | Main |               |           | 2        |           |              |              |              |             |              |           |            |             |             | 2     |
| CYAOLI02 | Main | 1             |           |          |           |              |              |              |             |              |           |            |             |             | 1     |
| CYAVR02  | Main | 1             |           |          |           |              |              |              |             |              |           |            |             |             | 1     |
| AFTRU07  | Main |               |           | 1        |           |              |              |              |             |              |           |            |             |             | 1     |
| AFTRU08  | Main |               |           | 1        |           |              |              |              |             |              |           |            |             |             | 1     |
| TURPEL03 | Main |               |           | 1        |           |              |              |              |             |              |           |            |             |             | 1     |
| TURPEL04 | Main |               |           | 1        |           |              |              |              |             |              |           |            |             |             | 1     |
| ANVIR01  | Main |               |           |          |           |              | 1            |              |             |              |           |            |             |             | 1     |
| BUL04    | Main |               |           |          |           |              | 1            |              |             |              |           |            |             |             | 1     |
| BUL05    | Main |               |           |          |           |              | 1            |              |             |              |           |            |             |             | 1     |
| CIANO01  | Main |               |           |          |           |              |              |              |             | 1            |           |            |             |             | 1     |
| TURAF01  | Main |               |           |          |           |              |              |              |             |              |           | 1          |             |             | 1     |
| GRW04    | Both | 5             | 4         | 2        | 11        | 7            |              | 7            | 4           | 2            | 2         |            |             |             | 44    |
| GRW06    | Both | 1             | 1         | 5        | 7         | 5            | 1            | 3            |             |              |           | 1          |             | 1           | 25    |
| WW3      | Both | 1             | 5         | 1        | 4         | 3            | 2            |              | 1           |              |           |            |             |             | 17    |
| LINOLI01 | Both | 6             | 5         |          | 1         | 2            |              |              |             | 2            |           |            |             |             | 16    |

|          |      |    |    |    |    |    |   |   |   |   |   |   |   |   |   |   |   |    |
|----------|------|----|----|----|----|----|---|---|---|---|---|---|---|---|---|---|---|----|
| COLL7    | Both | 5  | 7  |    |    | 1  | 1 |   | 1 |   |   |   |   |   |   |   |   | 15 |
| RECOB4   | Both | 13 |    |    |    |    |   |   | 2 |   |   |   |   |   |   |   |   | 15 |
| PYSUN1   | Both | 11 | 1  |    |    |    | 1 |   |   |   |   |   |   |   |   |   |   | 13 |
| MALNI02  | Both |    | 10 |    | 1  | 1  |   | 1 |   |   |   |   |   |   |   |   |   | 13 |
| CYAOLIO4 | Both | 11 |    |    |    |    | 1 |   |   |   |   |   |   |   |   |   |   | 12 |
| AEMO01   | Both | 4  | 5  |    | 1  |    |   |   | 1 |   |   |   |   |   |   |   | 1 | 12 |
| PLOPRI01 | Both | 7  | 1  |    |    |    |   |   |   |   | 1 |   |   |   |   |   |   | 9  |
| SYBOR09  | Both |    | 1  | 1  | 1  | 1  | 1 | 1 |   |   |   |   |   |   |   |   |   | 5  |
| PLACAS02 | Both | 2  |    | 1  |    | 1  |   |   |   |   |   |   |   |   |   |   |   | 4  |
| AFTRU5   | Both |    |    | 3  |    |    |   |   | 1 |   |   |   |   |   |   |   |   | 4  |
| CYAORI01 | Both | 1  | 1  |    |    |    |   |   |   |   |   |   |   |   |   |   |   | 2  |
| PLOSAN05 | Both |    | 2  |    |    |    |   |   |   |   |   |   |   |   |   |   |   | 2  |
| AFTRU09  | Both |    |    | 1  |    |    |   |   |   |   |   |   |   |   |   |   |   | 1  |
| <hr/>    |      |    |    |    |    |    |   |   |   |   |   |   |   |   |   |   |   |    |
| PLOCUC02 | Isl  |    | 3  |    |    |    |   |   |   |   |   |   |   |   |   |   |   | 3  |
| ANAHAR03 | Isl  | 1  |    |    |    |    |   |   |   |   |   |   |   |   |   |   |   | 1  |
| ANANEW01 | Isl  | 1  |    |    |    |    |   |   |   |   |   |   |   |   |   |   |   | 1  |
| PLOPRI02 | Isl  |    | 1  |    |    |    |   |   |   |   |   |   |   |   |   |   |   | 1  |
| TUROLIO1 | Isl  |    |    | 1  |    |    |   |   |   |   |   |   |   |   |   |   |   | 1  |
| TUROLIO2 | Isl  |    |    | 1  |    |    |   |   |   |   |   |   |   |   |   |   |   | 1  |
| TUROLIO3 | Isl  |    |    | 1  |    |    |   |   |   |   |   |   |   |   |   |   |   | 1  |
| TUROLIO4 | Isl  |    |    | 1  |    |    |   |   |   |   |   |   |   |   |   |   |   | 1  |
| TUROLI11 | Isl  |    |    | 1  |    |    |   |   |   |   |   |   |   |   |   |   |   | 1  |
| TUROLI12 | Isl  |    |    | 1  |    |    |   |   |   |   |   |   |   |   |   |   |   | 1  |
| CRIMOZ01 | Isl  |    |    |    |    | 1  |   |   |   |   |   |   |   |   |   |   |   | 1  |
| ZOSBRU01 | Isl  |    |    |    |    |    |   | 1 |   |   |   |   |   |   |   |   |   | 1  |
| Total    |      | 64 | 43 | 18 | 15 | 15 | 7 | 6 | 5 | 2 | 1 | 1 | 1 | 1 | 1 | 1 |   |    |

(b) *Haemoproteus* sp.

|          | Site | Ploceidae | Zosteropidae | Nectariniidae | Estrildidae | Turdidae | Columbidae | Fringillidae | Pycnonotidae | Monarchidae | Cisticolidae | Sturnidae | Sylviidae | Alcedinidae | Total |
|----------|------|-----------|--------------|---------------|-------------|----------|------------|--------------|--------------|-------------|--------------|-----------|-----------|-------------|-------|
| QUERY01  | Main | 2         |              |               |             |          |            |              | 1            |             |              |           | 1         |             | 4     |
| RBQ11    | Main | 4         |              |               |             |          |            |              |              |             |              |           |           |             | 4     |
| VILWE04  | Main | 3         |              |               |             |          |            |              |              |             |              |           |           |             | 3     |
| VILWE3   | Main | 3         |              |               |             |          |            |              |              |             |              |           |           |             | 3     |
| TERUF01  | Main |           |              |               |             | 1        |            |              |              | 2           |              |           |           |             | 3     |
| RBQ07    | Main | 2         |              |               |             |          |            |              |              |             |              |           |           |             | 2     |
| REB2     | Main | 2         |              |               |             |          |            |              |              |             |              |           |           |             | 2     |
| PLONIG07 | Main | 1         |              | 1             |             |          |            |              |              |             |              |           |           |             | 2     |
| LONBIC01 | Main | 1         |              |               | 1           |          |            |              |              |             |              |           |           |             | 2     |
| EUPHOR01 | Main | 1         |              |               |             |          |            |              |              |             |              |           |           |             | 1     |
| PLOCUC05 | Main | 1         |              |               |             |          |            |              |              |             |              |           |           |             | 1     |
| PLONIG08 | Main | 1         |              |               |             |          |            |              |              |             |              |           |           |             | 1     |
| PLONIG09 | Main | 1         |              |               |             |          |            |              |              |             |              |           |           |             | 1     |
| CINPRE01 | Main |           |              | 1             |             |          |            |              |              |             |              |           |           |             | 1     |
| CYAOLIO3 | Main |           |              | 1             |             |          |            |              |              |             |              |           |           |             | 1     |
| CYAOLIO5 | Main |           |              | 1             |             |          |            |              |              |             |              |           |           |             | 1     |
| CYAOLIO6 | Main |           |              | 1             |             |          |            |              |              |             |              |           |           |             | 1     |
| CRYRE01  | Main |           |              |               | 1           |          |            |              |              |             |              |           |           |             | 1     |
| LONCUC02 | Main |           |              |               | 1           |          |            |              |              |             |              |           |           |             | 1     |
| ESTMEL02 | Main |           |              |               | 1           |          |            |              |              |             |              |           |           |             | 1     |
| AFTRU06  | Main |           |              |               |             | 1        |            |              |              |             |              |           |           |             | 1     |
| ILABY01  | Main |           |              |               |             | 1        |            |              |              |             |              |           |           |             | 1     |
| TURAFE02 | Main |           |              |               |             |          | 1          |              |              |             |              |           |           |             | 1     |
| ZOSSTE01 | Both |           | 6            |               |             |          |            |              |              |             |              |           |           |             | 6     |
| CRIRUF01 | Both |           |              |               |             | 1        |            | 2            | 1            |             |              |           |           | 1           | 5     |
| YEWE2    | Both | 1         | 3            |               |             |          |            |              |              |             |              |           |           |             | 4     |
| ESTMEL03 | Both |           |              |               | 1           |          | 2          |              |              |             |              |           |           |             | 3     |
| LONCUC01 | Both |           |              |               | 1           |          |            |              |              |             |              |           |           |             | 1     |
| ZOSMAD01 | Isl  |           | 6            | 1             |             |          |            |              |              |             |              | 1         |           |             | 8     |
| ZOSLUG01 | Isl  |           | 2            |               |             |          |            |              |              |             |              |           |           |             | 2     |
| ZOSGRI01 | Isl  |           | 1            |               |             |          |            |              |              |             |              |           |           |             | 1     |

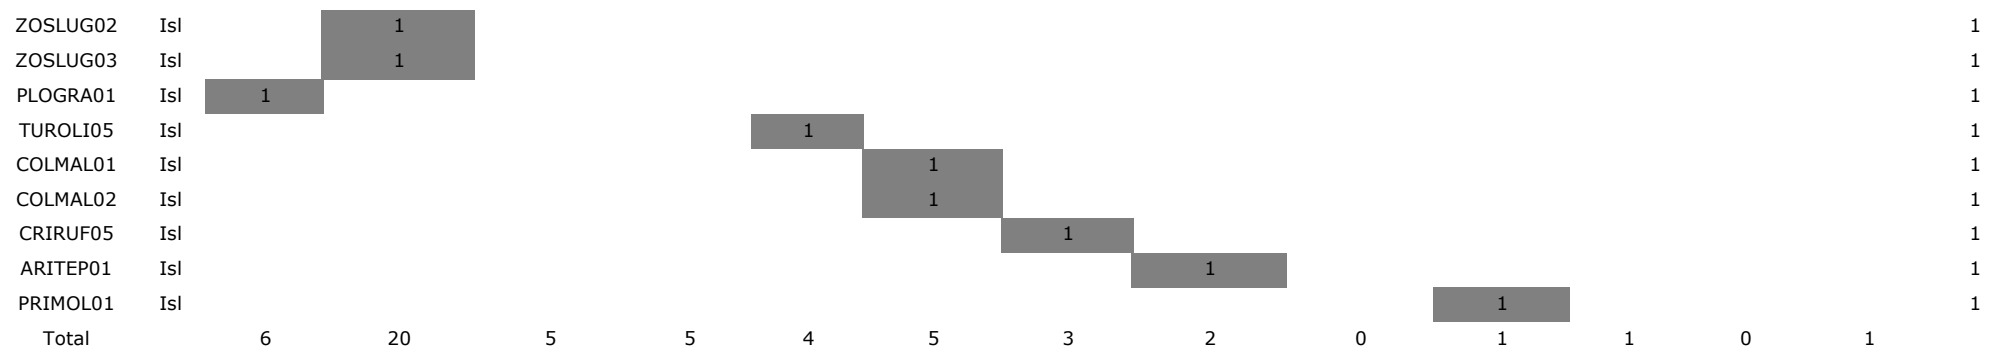



(c) *Leucocytozoon sp.*

|          | Site | Ploceidae | Nectariniidae | Pycnonotidae | Turdidae | Zosteropidae | Estrildidae | Fringillidae | Sylviidae | Cisticolidae | Sturnidae | Alcedinidae | Columbidae | Monarchidae | Total |
|----------|------|-----------|---------------|--------------|----------|--------------|-------------|--------------|-----------|--------------|-----------|-------------|------------|-------------|-------|
| RECOB3   | Main | 4         |               | 2            | 1        | 1            | 1           | 1            | 4         |              |           |             |            |             | 14    |
| REB7     | Main | 1         |               |              | 1        |              |             | 2            |           |              |           |             |            |             | 4     |
| SATECO01 | Main | 1         | 1             | 1            | 1        |              |             |              |           |              |           |             |            |             | 4     |
| ANLAT10  | Main | 2         |               | 1            |          |              |             |              |           |              |           | 1           |            |             | 4     |
| HIRUS11  | Main | 1         | 2             |              |          |              |             |              |           |              |           |             |            |             | 3     |
| PLOCUC01 | Main | 3         |               |              |          |              |             |              |           |              |           |             |            |             | 3     |
| PLONIG06 | Main | 2         |               |              |          |              |             |              |           |              |           |             |            |             | 2     |
| CAMCHL01 | Main |           |               |              |          |              |             |              |           | 1            |           |             |            |             | 1     |
| HYLPRA01 | Main |           |               |              |          |              |             | 1            |           |              |           |             |            |             | 1     |
| ANLAT12  | Main |           |               | 1            |          |              |             |              |           |              |           |             |            |             | 1     |
| ANLAT17  | Main |           |               | 1            |          |              |             |              |           |              |           |             |            |             | 1     |
| ANLAT18  | Main |           |               | 1            |          |              |             |              |           |              |           |             |            |             | 1     |
| ARITEP02 | Main |           |               | 1            |          |              |             |              |           |              |           |             |            |             | 1     |
| CYAOLI15 | Main |           | 1             |              |          |              |             |              |           |              |           |             |            |             | 1     |
| CYAOLI16 | Main |           | 1             |              |          |              |             |              |           |              |           |             |            |             | 1     |
| CYAOLI17 | Main |           | 1             |              |          |              |             |              |           |              |           |             |            |             | 1     |
| CYAOLI18 | Main |           | 1             |              |          |              |             |              |           |              |           |             |            |             | 1     |
| CYAVERO3 | Main |           | 1             |              |          |              |             |              |           |              |           |             |            |             | 1     |
| CYAVERO4 | Main |           | 1             |              |          |              |             |              |           |              |           |             |            |             | 1     |
| EUPHOR02 | Main | 1         |               |              |          |              |             |              |           |              |           |             |            |             | 1     |
| EUPHOR03 | Main | 1         |               |              |          |              |             |              |           |              |           |             |            |             | 1     |
| EUPHOR04 | Main | 1         |               |              |          |              |             |              |           |              |           |             |            |             | 1     |
| PLOCUC03 | Main | 1         |               |              |          |              |             |              |           |              |           |             |            |             | 1     |
| PLOCUC04 | Main | 1         |               |              |          |              |             |              |           |              |           |             |            |             | 1     |
| PLOMEL04 | Main | 1         |               |              |          |              |             |              |           |              |           |             |            |             | 1     |
| PLONIG04 | Main | 1         |               |              |          |              |             |              |           |              |           |             |            |             | 1     |
| PLONIG05 | Main | 1         |               |              |          |              |             |              |           |              |           |             |            |             | 1     |
| PLONIG10 | Main | 1         |               |              |          |              |             |              |           |              |           |             |            |             | 1     |
| PLONIG11 | Main | 1         |               |              |          |              |             |              |           |              |           |             |            |             | 1     |
| PLONIG12 | Main | 1         |               |              |          |              |             |              |           |              |           |             |            |             | 1     |
| PLONIG13 | Main | 1         |               |              |          |              |             |              |           |              |           |             |            |             | 1     |

|          |      |    |    |   |   |   |   |   |   |   |   |   |   |   |  |  |  |  |  |  |   |    |
|----------|------|----|----|---|---|---|---|---|---|---|---|---|---|---|--|--|--|--|--|--|---|----|
| PLONIG14 | Main | 1  |    |   |   |   |   |   |   |   |   |   |   |   |  |  |  |  |  |  | 1 |    |
| PLONIG15 | Main | 1  |    |   |   |   |   |   |   |   |   |   |   |   |  |  |  |  |  |  |   | 1  |
| TURPEL02 | Main |    |    |   |   | 1 |   |   |   |   |   |   |   |   |  |  |  |  |  |  |   | 1  |
| ZOSSEN04 | Main |    |    |   |   |   | 1 |   |   |   |   |   |   |   |  |  |  |  |  |  |   | 1  |
| AFR211   | Both | 1  |    |   |   | 1 | 2 | 1 |   | 1 | 3 | 2 |   |   |  |  |  |  |  |  |   | 11 |
| AFR214   | Both | 2  | 1  |   |   |   |   | 4 |   | 1 |   |   |   |   |  |  |  |  |  |  |   | 8  |
| CRIRUF02 | Both | 2  | 1  | 1 |   |   |   |   |   | 2 |   |   |   |   |  |  |  |  |  |  |   | 6  |
| AFR212   | Both |    |    | 1 |   |   | 1 | 1 |   |   |   |   |   |   |  |  |  |  |  |  |   | 3  |
| CRIRUF04 | Both |    |    |   |   |   |   | 1 | 1 |   |   |   |   |   |  |  |  |  |  |  |   | 2  |
| TURPEL01 | Both |    |    |   |   | 1 |   |   |   |   |   |   |   |   |  |  |  |  |  |  |   | 1  |
| ZOBOR04  | Isl  |    |    |   |   |   | 4 |   |   |   |   |   |   |   |  |  |  |  |  |  |   | 4  |
| PLOSAN01 | Isl  | 1  |    |   |   |   |   |   |   |   |   |   |   |   |  |  |  |  |  |  |   | 1  |
| PLOSAN04 | Isl  | 2  |    |   |   |   |   |   |   |   |   |   |   |   |  |  |  |  |  |  |   | 2  |
| ANAHAR01 | Isl  |    | 1  |   |   |   |   |   |   |   |   |   |   |   |  |  |  |  |  |  |   | 1  |
| ANAHAR02 | Isl  |    | 1  |   |   |   |   |   |   |   |   |   |   |   |  |  |  |  |  |  |   | 1  |
| TUROLI06 | Isl  |    |    | 1 |   | 1 |   |   |   |   |   |   |   |   |  |  |  |  |  |  |   | 2  |
| TUROLI08 | Isl  |    |    |   |   | 1 |   |   |   |   |   |   |   |   |  |  |  |  |  |  |   | 1  |
| TUROLI09 | Isl  |    |    |   |   | 1 |   |   |   |   |   |   |   |   |  |  |  |  |  |  |   | 1  |
| TUROLI10 | Isl  |    |    |   |   | 1 |   |   |   |   |   |   |   |   |  |  |  |  |  |  |   | 1  |
| Total    |      | 32 | 13 | 9 | 9 | 8 | 7 | 6 | 2 | 4 | 2 | 1 | 0 | 0 |  |  |  |  |  |  |   |    |

**Figure S2.1** Rarefaction and extrapolation curves with 95% confidence intervals (dashed lines) for a) *Plasmodium* sp., b) *Haemoproteus* sp. and c) *Leucocytozoon* sp. Black lines correspond to mainland estimates and red lines to island estimates. Dots represent the actual number of samples.

a)

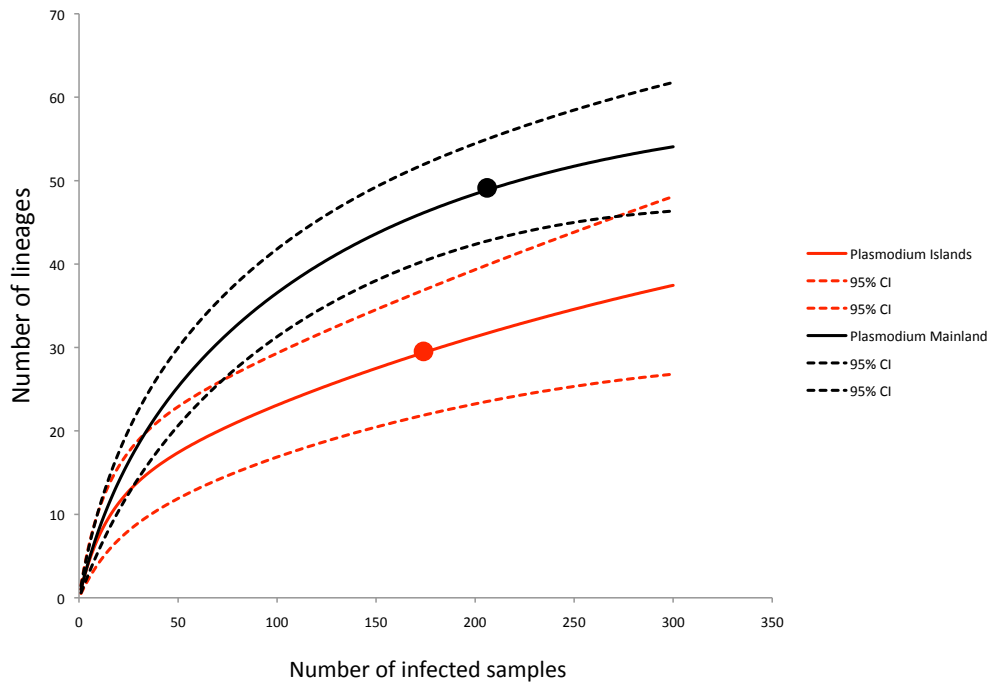

b)

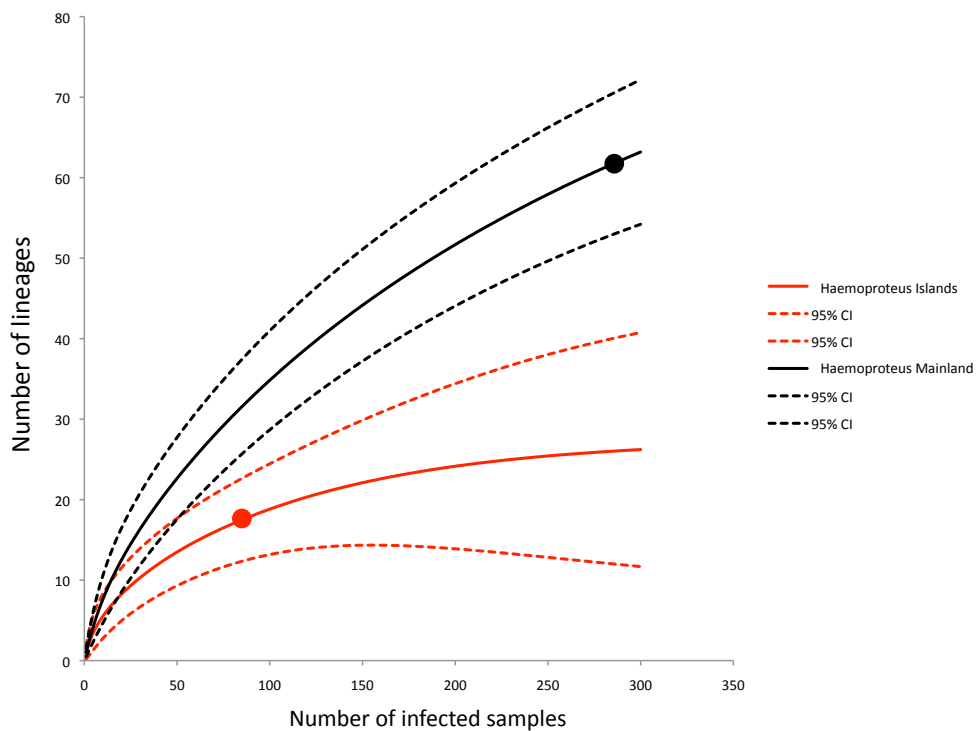

c)

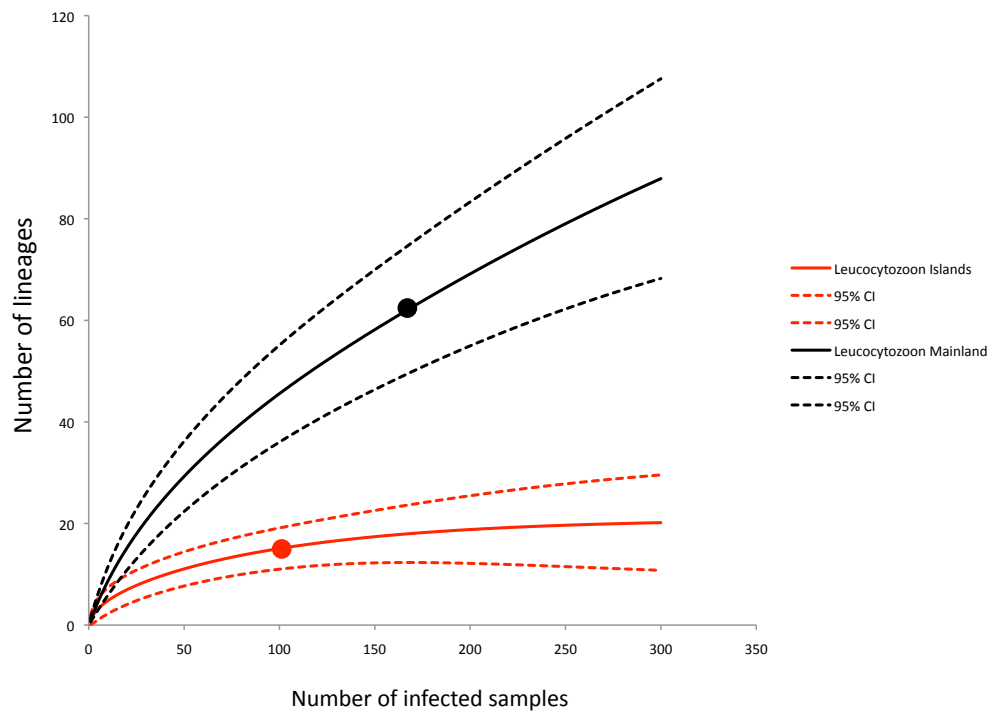

**Figure S2.2** Prevalence of generalist and specialist Haemosporidian lineages in the Gulf of Guinea, per genus and per year.

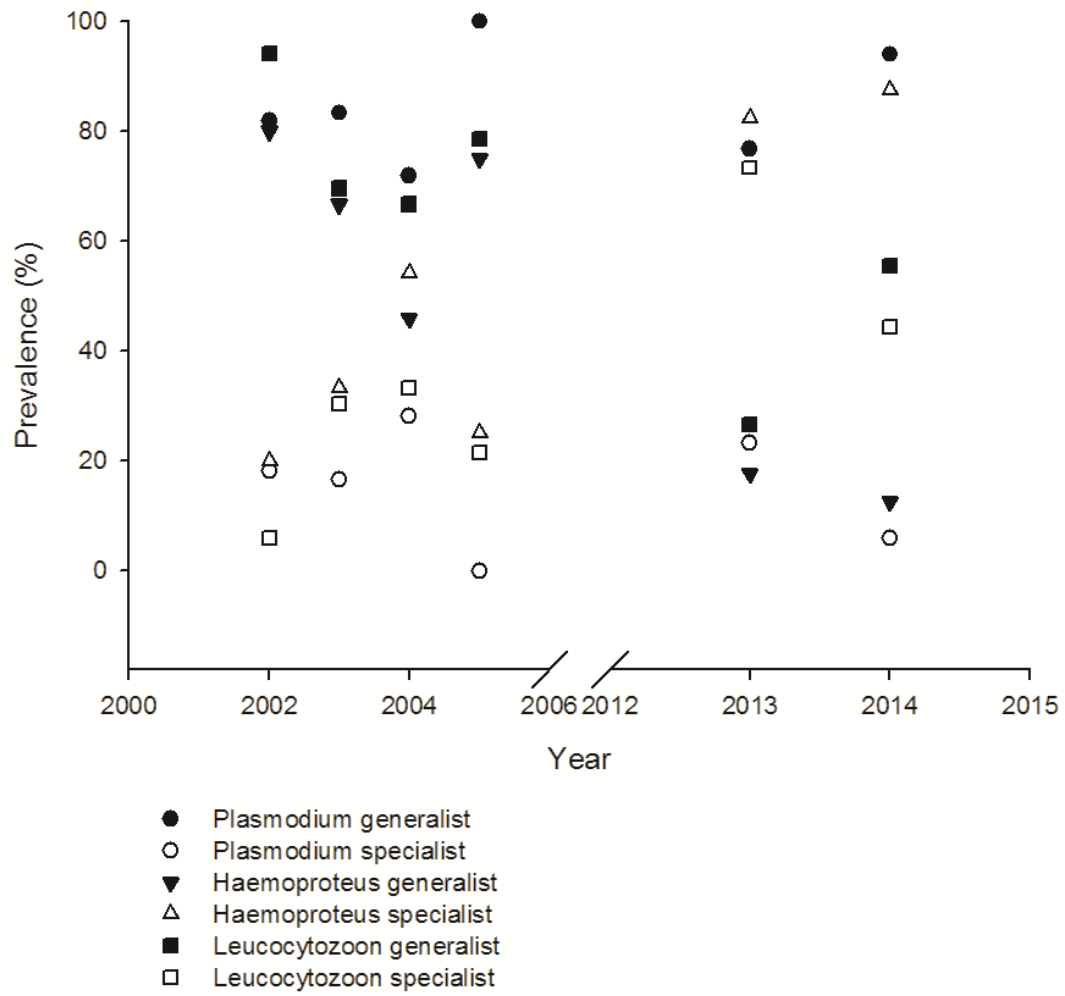

### **Appendix S3** Phylogenetic analyses and phylogenetic trees.

For the three haemosporidia genera we recovered all the sequences available on MalAvi from the Gulf of Guinea. Relationships between lineages were inferred with Bayesian inference, both as implemented in MRBAYES 3.2.6 (Huelsenbeck & Ronquist, 2001; Ronquist & Huelsenbeck, 2003) and in BEAST 1.8.2 (Drummond *et al.*, 2012). We used PARTITIONFINDER 1.1.1 (Lanfear *et al.*, 2012) to determine the best-fit partitioning scheme for the *cyt b* dataset (486 bp) and the respective substitution models for each partition, using the Bayesian Information Criterion. For both MRBAYES and BEAST, we carried out two independent runs of 25 million generations sampled every 2500 generations, for a total of 10000 trees each per run. For the 'burn-in', 25% of the trees were discarded from the posterior distribution. The remaining trees were used to calculate the posterior probabilities (15000 trees). Convergence of the independent runs and the Effective Sampling Size (ESS) of each parameter were assessed in TRACER version 1.5 (Drummond & Rambaut, 2007); ESS above 200 are considered adequate. For the runs in MRBAYES, the potential scale reduction factor (PSRF) was also checked, with values close to 1 supporting convergence. Analyses in BEAST were used not only to confirm results from MRBAYES but also to produce chronograms – ultrametric trees with the splits between lineages occurring along a timescale. As the evolutionary rate of haemosporidians has been difficult to estimate (Bensch *et al.*, 2013), the clock rate has been left at 1.0. This gives a relative time sequence of branching events. The divergence values can be multiplied by any putative rate (in substitutions per site per lineage per million years) in order to be translated in years before present. For the most widely used rate of 1.2% sequence divergence per million year for haemosporidians (Ricklefs & Outlaw, 2010), this means multiplying divergence values by 0.006. Initial runs were performed with different tree priors (Yule, Birth-and-Death) and clock models (strict and uncorrelated relaxed clock). A Bayes factors approach (Kass & Raftery, 1995) rejected, as expected, the strict clock and showed that tree prior choice had no impact. The final analysis used a relaxed-clock model assuming an uncorrelated lognormal clock model (standard deviation prior: exponential with mean 1/3) and a Yule speciation model (uniform prior between 0 and 100).

The relationships between the different haemosporida genera have been extremely hard to resolve (Perkins, 2014). The classical position of *Leucocytozoon* as the outgroup to all other

genera was replaced by a basal position for mammalian *Plasmodium* and *Hepatocystis* (Outlaw & Ricklefs, 2011), but it was recently supported again by a study using multiple slow evolving nuclear markers (Borner *et al.*, 2016). Ongoing whole-genome work suggests yet again another arrangement where *Haemoproteus* and *Leucocytozoon* make a basal clade, avian *Plasmodium* is the most recent clade, and the mammal and sauropsid haemosporida are in between (Susan Perkins, pers. comm.). Using a certain but distant outgroup (*Theileria*) we recovered the ‘classic’ topology, where *Leucocytozoon* is basal to all haemosporida and the mammalian *Plasmodium* and *Hepatocystis* are a sister clade to avian *Plasmodium* and *Haemoproteus*. Nevertheless, this sister relationship had no statistical support making the relationships between all groups unresolved. Using a Bayes factor approach, all possible relationships between *Leucocytozoon*, *Haemoproteus*, and *Plasmodium* were equally likely (Fig. S3.1). We decided to run the final analyses with our Gulf of Guinea dataset, rooting the trees with *Leucocytozoon*.

## References

- Bensch, S., Hellgren, O., Križanauskienė, A., Palinauskas, V., Valkiūnas, G., Outlaw, D. & Ricklefs, R.E. (2013) How can we determine the molecular clock of malaria parasites? *Trends in Parasitology*, **29**, 363-369.
- Borner, J., Pick, C., Thiede, J., Kolawole, O.M., Kingsley, M.T., Schulze, J., Cottontail, V.M., Wellinghausen, N., Schmidt-Chanasit, J., Bruchhaus, I. & Burmester, T. (2016) Phylogeny of haemosporidian blood parasites revealed by a multi-gene approach. *Molecular Phylogenetics and Evolution*, **94, Part A**, 221-231.
- Drummond, A.J. & Rambaut, A. (2007) BEAST: Bayesian evolutionary analysis by sampling trees. *BMC Evolutionary Biology*, **7**, 214.
- Drummond, A.J., Suchard, M.A., Xie, D. & Rambaut, A. (2012) Bayesian Phylogenetics with BEAUti and the BEAST 1.7. *Molecular Biology and Evolution*, **29**, 1969-1973.
- Huelsenbeck, J.P. & Ronquist, F. (2001) MrBayes: Bayesian inference of phylogeny. *Bioinformatics*, **17**, 754-755.
- Kass, R.E. & Raftery, A.E. (1995) Bayes factors. *Journal of the American Statistical Association*, **90**, 773-795.

- Lanfear, R., Calcott, B., Ho, S.Y.W. & Guindon, S. (2012) PartitionFinder: combined selection of partitioning schemes and substitution models for phylogenetic analyses. *Molecular Biology and Evolution*, **29**, 1695-1701.
- Outlaw, D.C. & Ricklefs, R.E. (2011) Rerooting the evolutionary tree of malaria parasites. *Proceedings of the National Academy of Sciences USA*, **108**, 13181-13187.
- Perkins, S.L. (2014) Malaria's many mates: past, present, and future of the systematics of the order Haemosporida. *Journal of Parasitology*, **100**, 11-25.
- Ricklefs, R.E. & Outlaw, D.C. (2010) A molecular clock for malaria parasites. *Science*, **329**, 226-229.
- Ronquist, F. & Huelsenbeck, J.P. (2003) MRBAYES3: Bayesian phylogenetic inference under mixed models. *Bioinformatics*, **19**, 475-481.



**Figure S3.1** Phylogenetic relationships between the three avian haemosporidian genera inferred from a 486 bp fragment of *cyt b* using the Bayesian approach implemented in MRBAYES. Branching order between the genera remains uncertain as the closest known outgroup (*Theileria*) is very distantly related. Top: the classic topology, which was confirmed recently by a study using slowly evolving nuclear markers; it was the topology used in this study. Middle: topology proposed by Outlaw & Ricklefs (2011) where *Leucocytozoon* is not basal, but instead has a high mutation rate compared to the other two genera; bottom: third possibility, which curiously seems to be supported by ongoing genomic studies – in this case avian *Haemoproteus* and *Leucocytozoon* form the basal clade, whereas avian *Plasmodium* is at the tip, with all other mammalian and squamata Haemosporidia in between (not shown). Using the Bayes Factor approach with our Gulf of Guinea dataset, all topologies were equivalent.

**Figure S3.2 a)** Phylogenetic relationships of the avian Haemosporida genera from the Gulf of Guinea. Bayesian chronogram inferred with BEAST from a 486 bp fragment of *cyt b*. Divergence scale: top, substitutions per site per lineage per million years; bottom – million years before present using the 1.2% molecular clock rate estimated by Ricklefs & Outlaw (2010) for avian Haemosporida. Relationships were inferred for lineages from all genera at the same time, considering *Leucocytozoon* as the basal group (as in Fig. S3.1, top). For clarity, relationships within each genera are also presented separately: b) *Haemoproteus*; c) *Plasmodium*; d) *Leucocytozoon*. Except where a value is given, all branches with posterior probabilities below 0.95 were collapsed. The asterisk on the branch for ZOSMAD01 in figure b) refers to a lineage previously found on other islands (Madagascar, Grande Comore) and on the mainland (East Africa).

Figure S3.1

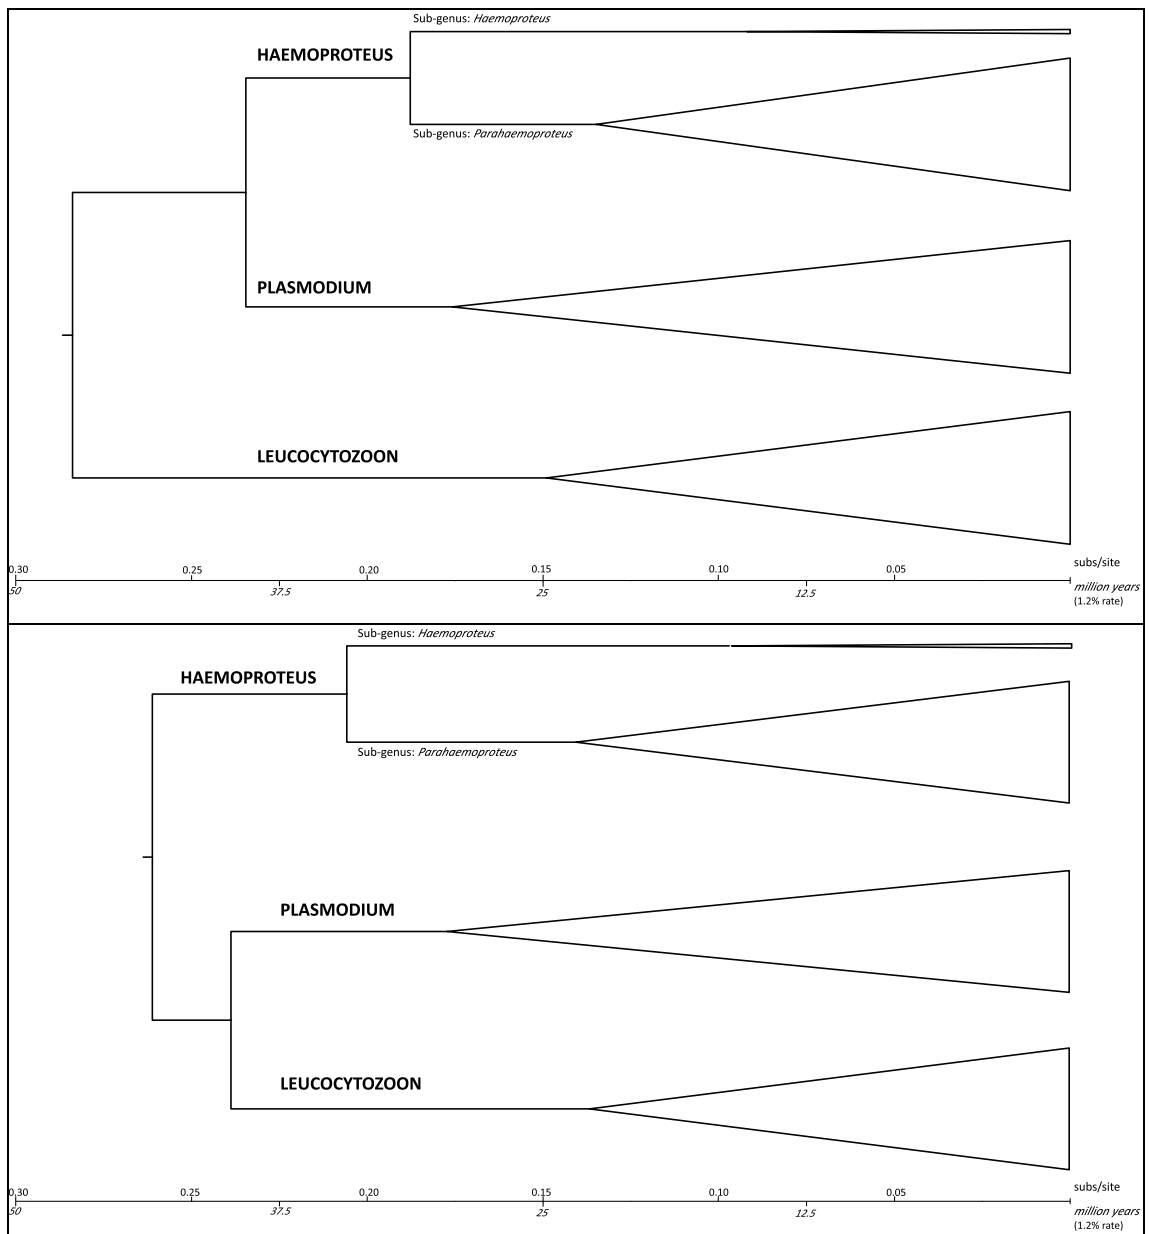

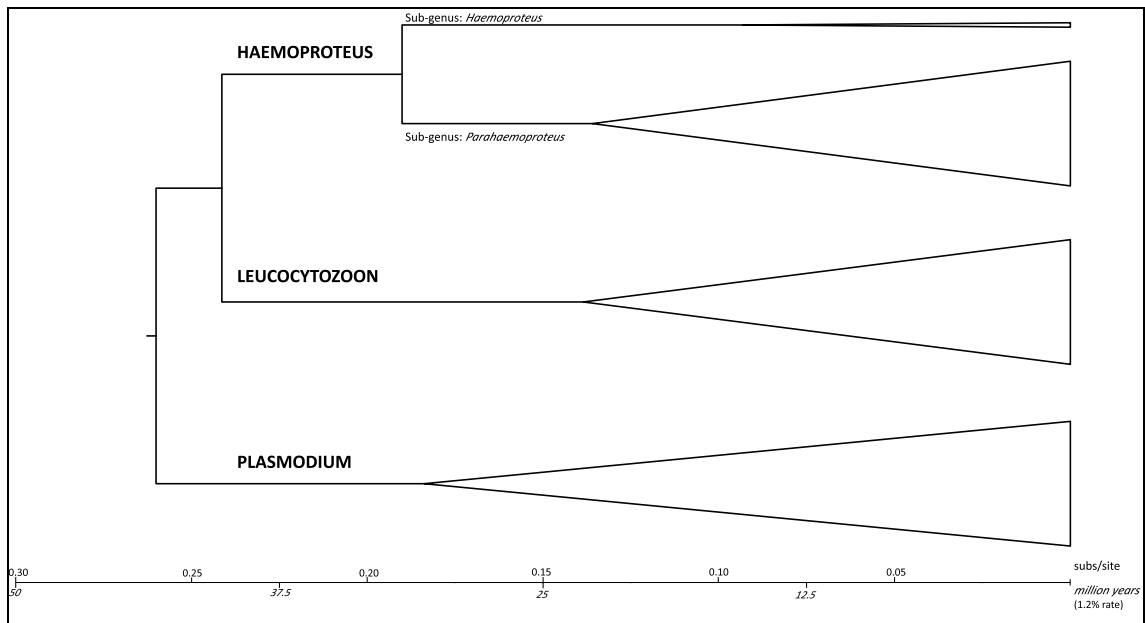

Figure S3.2a

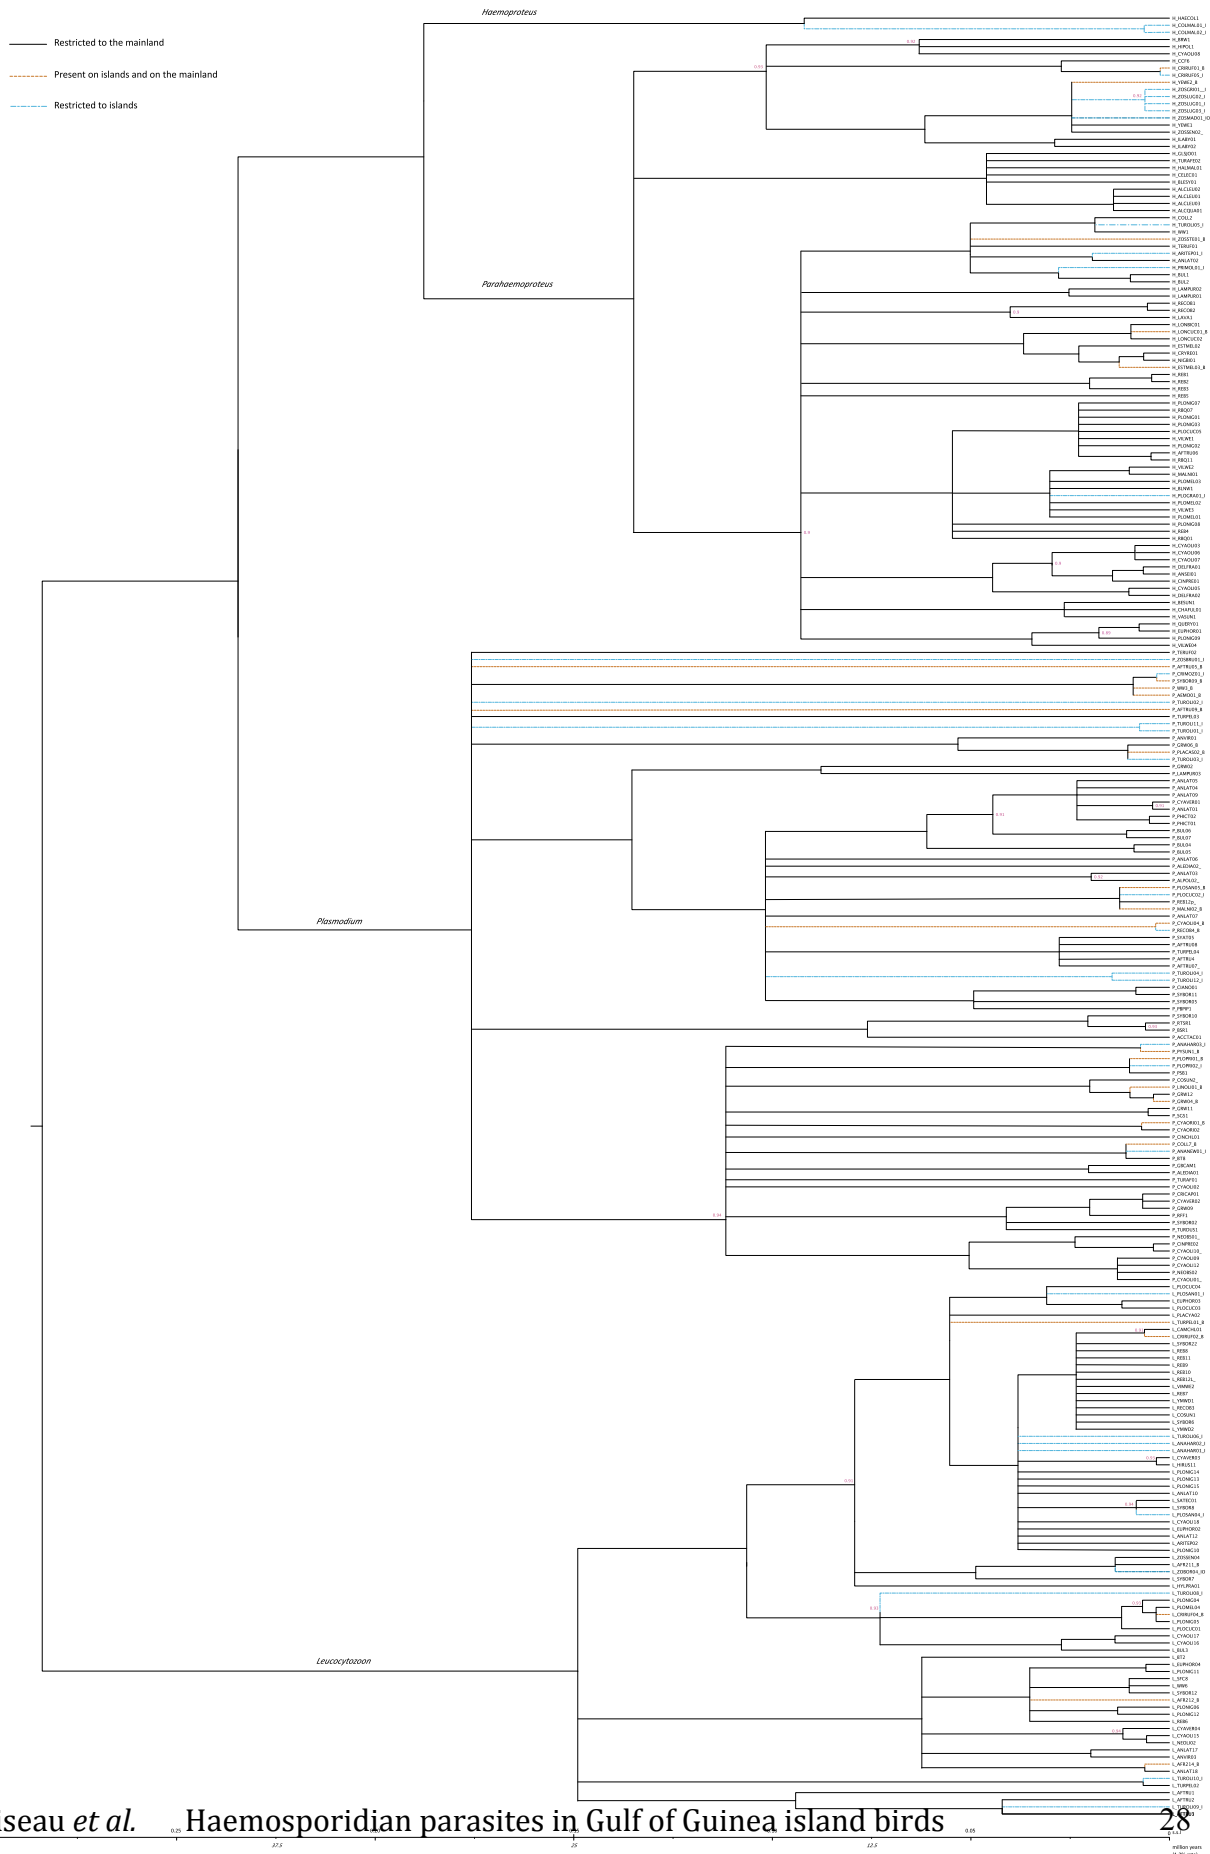

Figure S3.2b

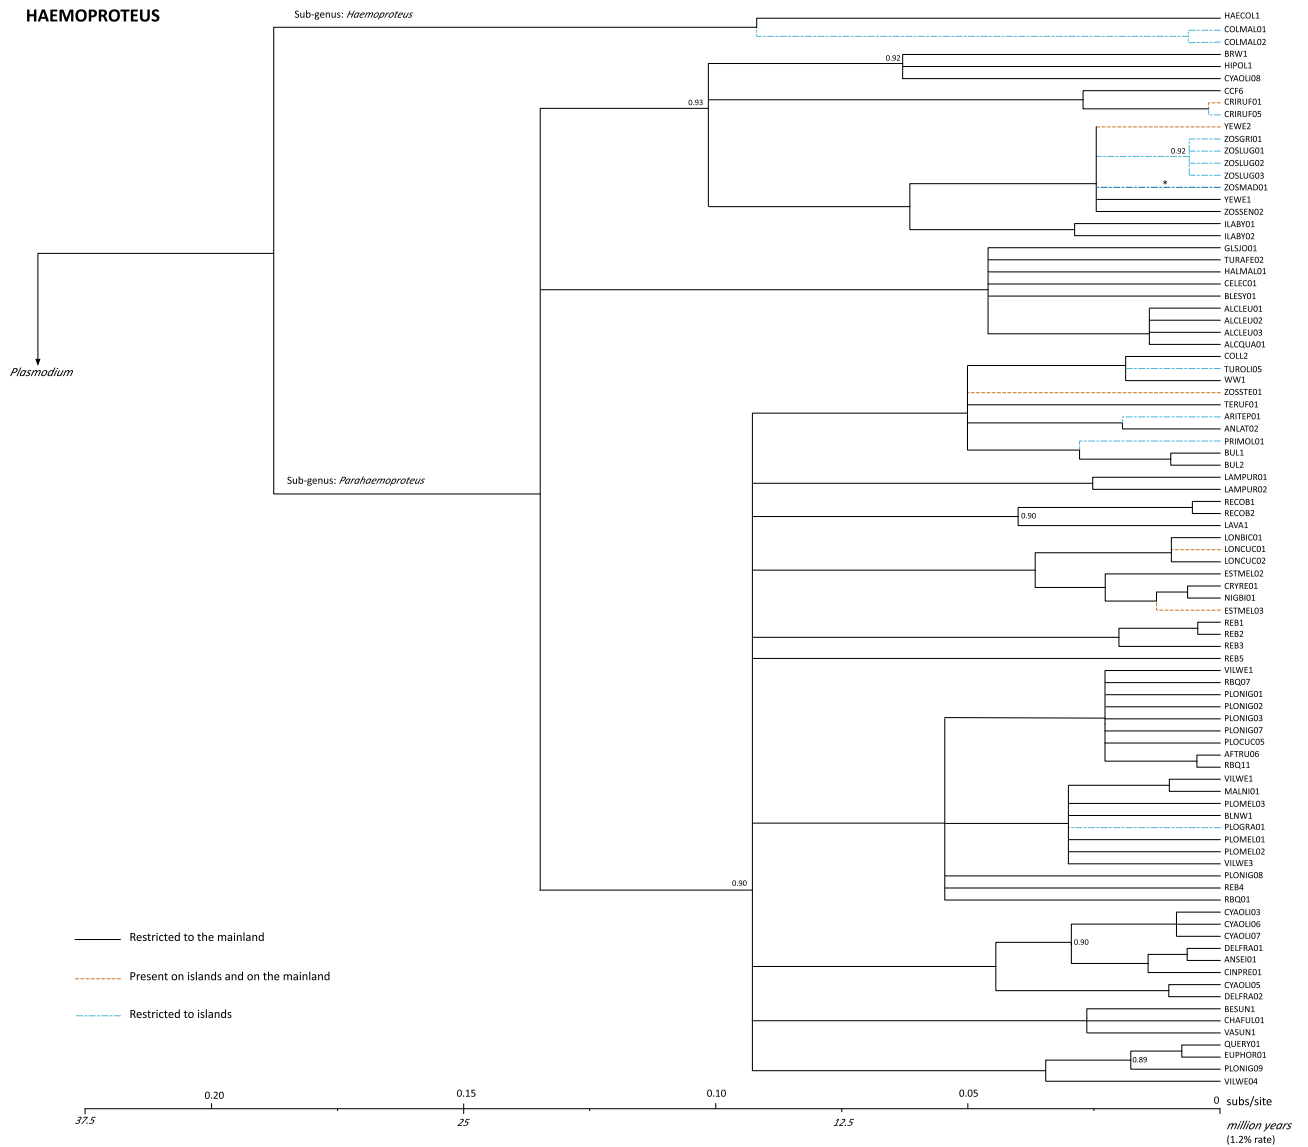

Figure S3.2c

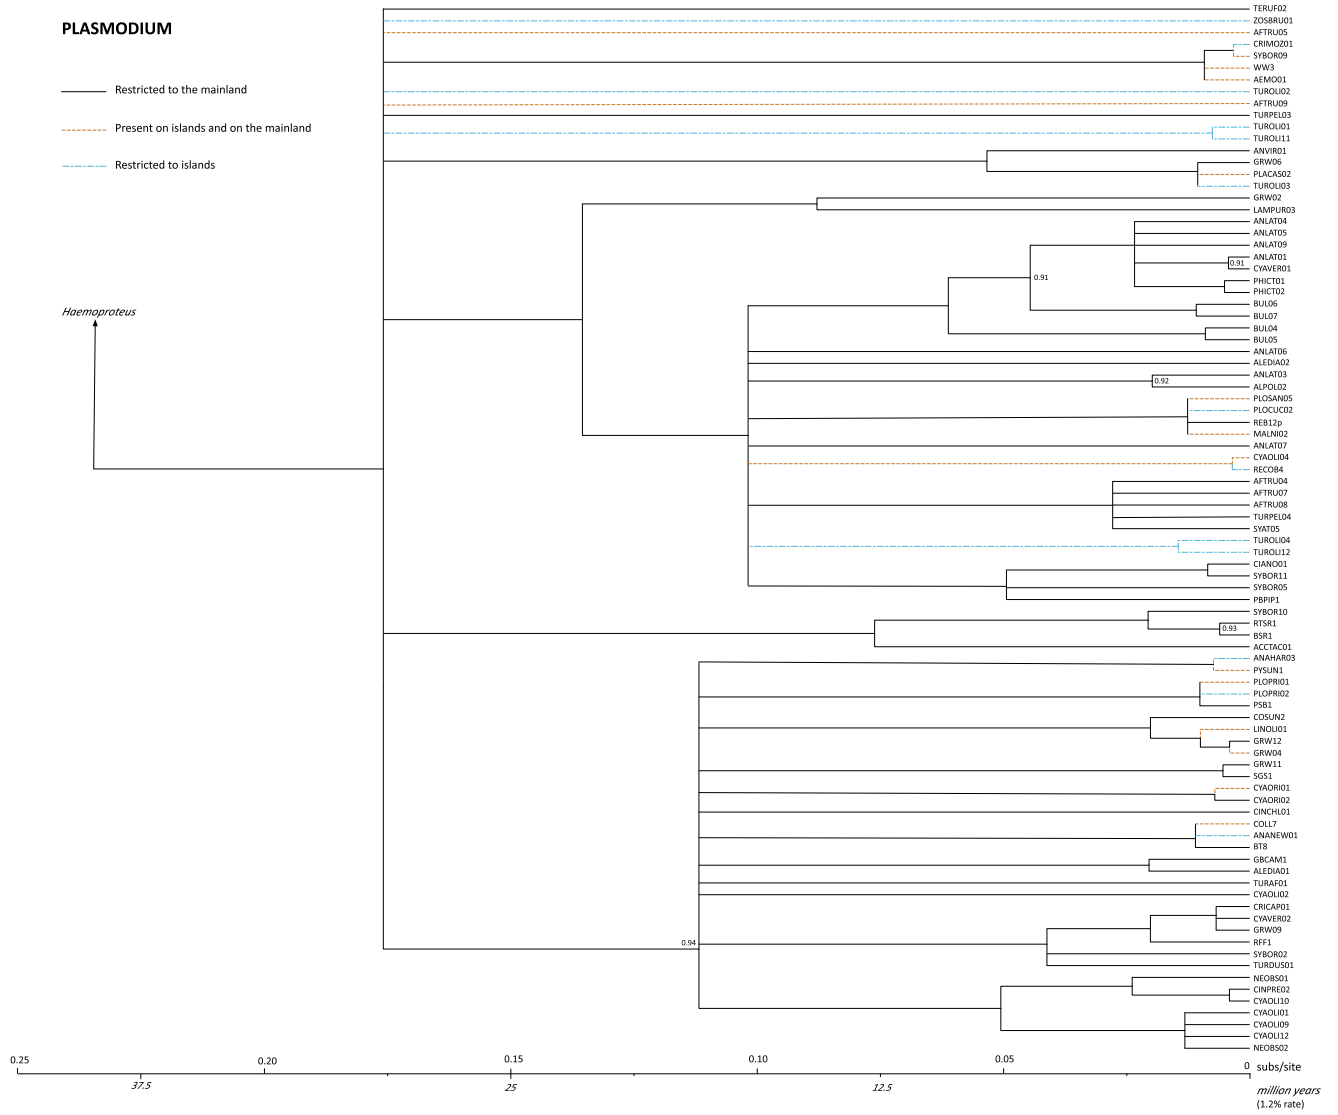

Figure S3.2d

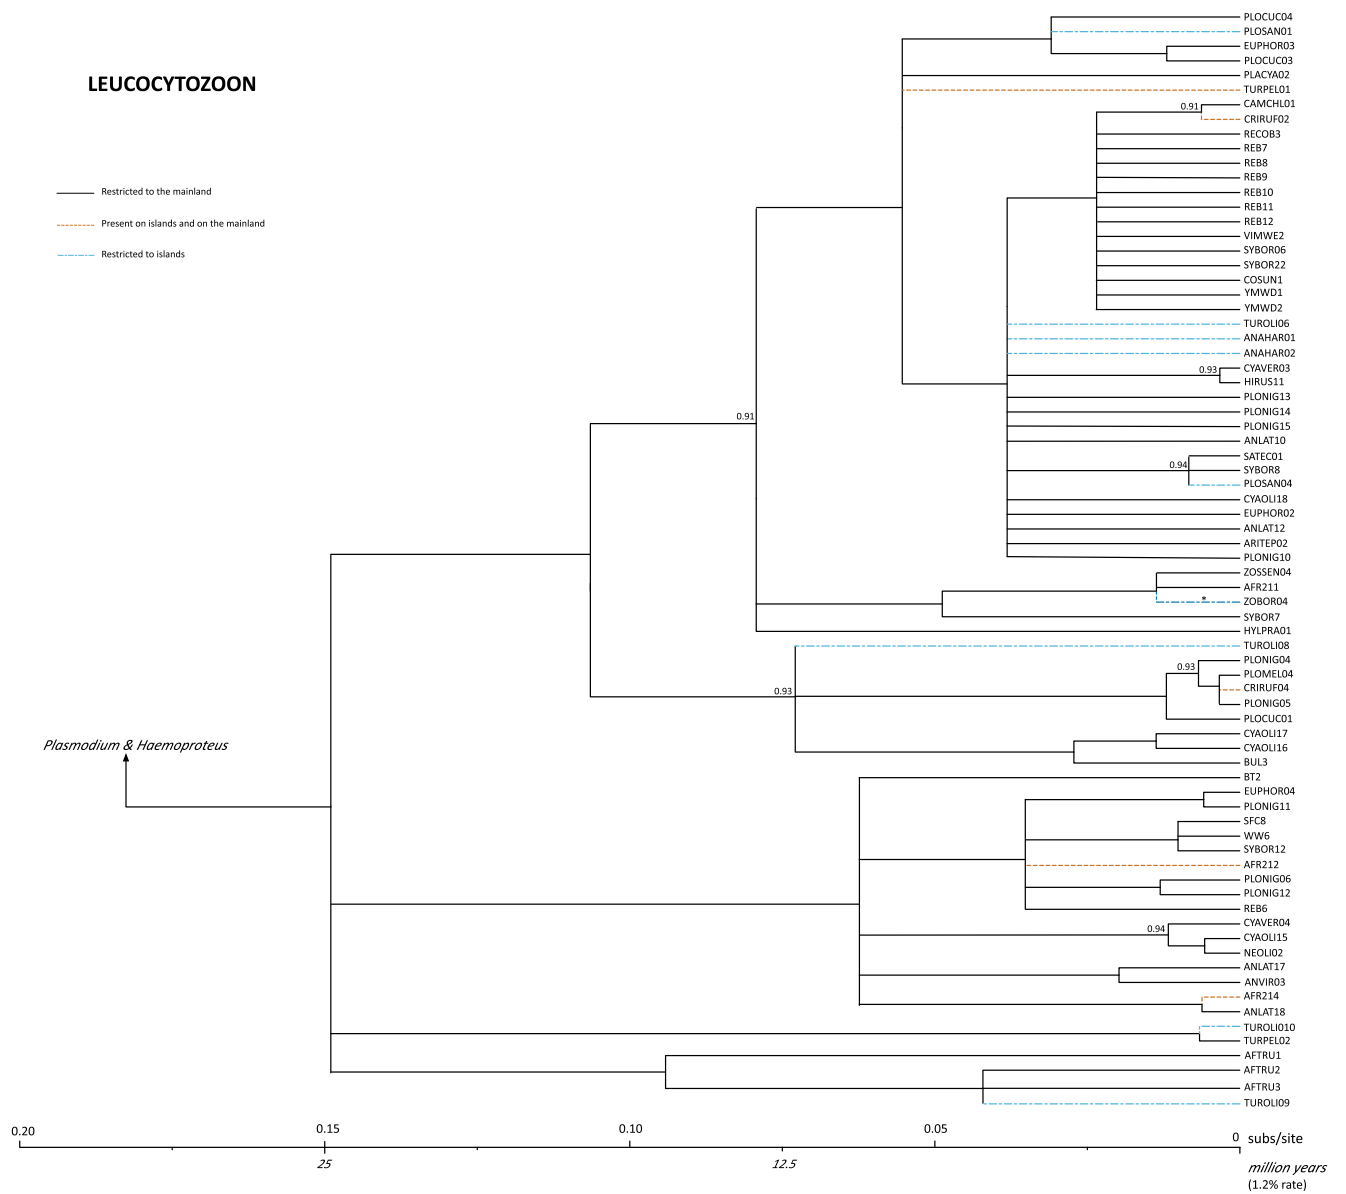

Supplement: NIHMS882183-supplement-Supp_Appendix_S1-3.pdf [file NIHMS882183-supplement-Supp_Appendix_S1-3.pdf]
